# Supplementary material for: Using formalin fixed paraffin embedded tissue to characterize the microbiota in p16-positive and p16-negative tongue squamous cell carcinoma: a pilot study
Source: BMC Oral Health. 2024 Feb 28;24:283. doi: 10.1186/s12903-024-04051-w (PMC10900712; doi:10.1186/s12903-024-04051-w)
Supplement: Supplementary file 3 — Supplementary Material 3 [file 12903_2024_4051_MOESM3_ESM.xlsx]

## Sheet: Supplementary  Table S6
Supplementary Table S6 Predicted the functional pathways by PICRUST(Sequence by primers 27F-338R)
Pathway level1	Pathway level2	Pathway level3	Level3 Description	p16_positive5	p16_positive7	p16_positive6	p16_positive3	p16_positive8	p16_positive9	p16_positive1	p16_positive2	p16_positive4	p16_negative4	p16_negative3	p16_negative1	p16_negative5	p16_negative6	p16_negative2	p-value
Metabolism	Metabolism Of Terpenoids and Polyketides	ko00906	Carotenoid biosynthesis	13145	4226	23291	7369	6593	32686	14062	14830	1762	329	2836	2251	9406	8269	515	0.0508935
Cellular Processes	Cell Growth and Death	ko04113	Meiosis - yeast	12431	4450	20490	2525	6699	21687	18406	16376	1082	47	2023	1253	9858	9250	364	0.0524333
Metabolism	Glycan Biosynthesis and Metabolism	ko00510	N-Glycan biosynthesis	10619	6796	17062	4275	6837	14958	7797	14684	807	273	1235	1310	8718	11867	700	0.0779714
Organismal Systems	Excretory System	ko04962	Vasopressin-regulated water reabsorption	527	40	558	182	60	48	36	362	0	0	0	0	92	60	0	0.0808314
Metabolism	Metabolism Of Cofactors and Vitamins	ko00830	Retinol metabolism	29837	14073	49988	14701	18873	44081	51682	35693	27056	22767	13011	17618	28915	26574	10935	0.0911077
Organismal Systems	Excretory System	ko04964	Proximal tubule bicarbonate reclamation	14693	7010	22449	5163	8742	17194	18162	21942	13158	10993	6265	7030	12872	12613	5219	0.0938548
Human Diseases	Cancer: Specific Types	ko05219	Bladder cancer	2746	1005	4878	1488	1559	3181	4160	1030	144	147	620	338	2441	1825	491	0.103744
Metabolism	Lipid Metabolism	ko00565	Ether lipid metabolism	8465	1894	13664	1794	3663	5681	4826	3982	172	135	1896	827	4037	3865	412	0.111318
Metabolism	Biosynthesis Of Other Secondary Metabolites	ko00965	Betalain biosynthesis	1262	214	1562	216	370	262	1034	486	1	0	480	0	303	400	40	0.117403
Metabolism	Metabolism Of Cofactors and Vitamins	ko00785	Lipoic acid metabolism	20226	12034	31827	11643	13821	31922	40413	36010	26724	22547	12276	17671	17694	21528	11289	0.125213
Metabolism	Biosynthesis Of Other Secondary Metabolites	ko00901	Indole alkaloid biosynthesis	1305	258	1791	216	450	643	1045	482	8	0	480	0	717	364	40	0.127795
Metabolism	Metabolism Of Other Amino Acids	ko00472	D-Arginine and D-ornithine metabolism	3998	1522	6221	1331	1922	2062	3318	2385	87	188	422	746	2299	3281	157	0.134994
Organismal Systems	Digestive System	ko04972	Pancreatic secretion	130	5	77	0	0	8	0	112	0	0	0	0	0	10	0	0.138437
Organismal Systems	Endocrine System	ko04920	Adipocytokine signaling pathway	31952	20568	53217	12677	23317	34238	43001	49033	26664	22287	13674	17720	31850	37959	11517	0.142837
Genetic Information Processing	Transcription	ko03022	Basal transcription factors	1791	643	3390	740	717	2020	1353	5643	92	159	496	330	1608	1019	530	0.149693
Organismal Systems	Digestive System	ko04971	Gastric acid secretion	96	2	50	0	0	0	0	112	0	0	0	0	0	0	0	0.150745
Organismal Systems	Digestive System	ko04970	Salivary secretion	96	2	50	0	0	0	0	112	0	0	0	0	0	0	0	0.150745
Organismal Systems	Excretory System	ko04961	Endocrine and other factor-regulated calcium reabsorption	96	2	50	0	0	0	0	112	0	0	0	0	0	0	0	0.150745
Organismal Systems	Excretory System	ko04960	Aldosterone-regulated sodium reabsorption	96	2	50	0	0	0	0	112	0	0	0	0	0	0	0	0.150745
Organismal Systems	Immune System	ko04622	RIG-I-like receptor signaling pathway	1902	1093	3224	916	1259	1650	1973	5215	78	140	563	397	1725	2125	448	0.154753
Metabolism	Metabolism Of Terpenoids and Polyketides	ko01057	Biosynthesis of type II polyketide products	1298	103	1730	888	131	314	55	4983	52	50	24	91	219	156	2	0.164309
Metabolism	Biosynthesis Of Other Secondary Metabolites	ko00232	Caffeine metabolism	978	380	2101	200	541	981	2084	270	35	5	44	0	1274	604	0	0.177736
Metabolism	Biosynthesis Of Other Secondary Metabolites	ko00945	Stilbenoid, diarylheptanoid and gingerol biosynthesis	12778	4060	23952	2382	6862	17778	6579	4203	662	35	956	130	12110	8788	461	0.19001
Organismal Systems	Endocrine System	ko03320	PPAR signaling pathway	74338	41805	123678	31248	51629	89610	121341	89017	79264	66769	36291	49140	78465	80237	32512	0.191365
Metabolism	Metabolism Of Terpenoids and Polyketides	ko00522	Biosynthesis of 12-, 14- and 16-membered macrolides	552	39	860	0	91	213	0	10	0	0	24	0	41	62	0	0.192161
Metabolism	Biosynthesis Of Other Secondary Metabolites	ko00943	Isoflavonoid biosynthesis	245	38	396	0	47	74	28	18	0	0	0	2	87	6	0	0.195669
Organismal Systems	Digestive System	ko04976	Bile secretion	1142	236	1538	307	378	822	332	182	12	9	91	0	688	567	43	0.196838
Metabolism	Lipid Metabolism	ko00100	Steroid biosynthesis	5763	1877	10594	316	2566	11759	1679	1817	465	97	670	256	5011	3280	144	0.210737
Metabolism	Metabolism Of Cofactors and Vitamins	ko00130	Ubiquinone and other terpenoid-quinone biosynthesis	109224	69193	172678	61704	81105	162448	231434	164187	159723	133728	70149	104655	102454	130002	66106	0.211377
Organismal Systems	Environmental Adaptation	ko04712	Circadian rhythm - plant	1940	635	2970	685	680	429	331	1632	14	12	572	105	903	1235	43	0.21509
Human Diseases	Infectious Disease: Bacterial	ko05100	Bacterial invasion of epithelial cells	627	456	925	98	472	3556	389	596	177	17	0	135	496	720	0	0.216798
Organismal Systems	Endocrine System	ko04614	Renin-angiotensin system	1640	588	2849	274	825	820	2407	132	29	101	549	2	1205	955	150	0.227986
Metabolism	Carbohydrate Metabolism	ko00020	Citrate cycle (TCA cycle)	250709	193113	412398	130952	212871	284987	457371	375844	290549	246884	136196	193709	274377	362291	124448	0.23218
-	-	-	Glycan bindng proteins	0	0	0	0	0	0	0	0	0	0	0	0	5	0	0	0.233688
Metabolism	Biosynthesis Of Other Secondary Metabolites	ko00331	Clavulanic acid biosynthesis	358	22	776	0	17	48	4	52	0	0	0	0	24	21	0	0.239272
Organismal Systems	Immune System	ko04666	Fc gamma R-mediated phagocytosis	341	114	485	343	154	372	429	2860	17	16	141	259	152	164	0	0.240008
Organismal Systems	Endocrine System	ko04912	GnRH signaling pathway	341	114	485	343	154	352	429	2860	17	16	141	259	152	164	0	0.24253
Cellular Processes	Transport and Catabolism	ko04144	Endocytosis	341	114	485	343	154	352	429	2860	17	16	141	259	152	164	0	0.24253
Organismal Systems	Endocrine System	ko04916	Melanogenesis	50	8	80	0	13	0	26	0	0	0	0	0	5	25	0	0.24625
Human Diseases	Cancer: Specific Types	ko05211	Renal cell carcinoma	7480	4116	12449	5429	5436	10742	19103	15204	13210	11218	5549	8045	6936	9037	5504	0.258095
Genetic Information Processing	Translation	ko03015	mRNA surveillance pathway	90	16	418	0	88	74	0	1303	0	0	0	0	24	54	0	0.25959
Metabolism	Xenobiotics Biodegradation and Metabolism	ko00633	Nitrotoluene degradation	34849	26743	62117	9233	29581	30700	46957	49488	26340	21701	11842	17660	36852	53479	10194	0.266541
Metabolism	Metabolism Of Terpenoids and Polyketides	ko01053	Biosynthesis of siderophore group nonribosomal peptides	18819	11039	31733	13024	14467	25681	39355	20354	26479	22759	12832	16091	20715	21303	11344	0.268253
Metabolism	Energy Metabolism	ko00196	Photosynthesis - antenna proteins	4742	2482	8421	0	3491	57283	6566	2436	2737	0	0	0	4314	3259	0	0.273421
Environmental Information Processing	Signal Transduction	ko04020	Calcium signaling pathway	387	159	555	0	216	3348	409	16	161	0	0	0	280	223	0	0.273983
Environmental Information Processing	Signaling Molecules and Interaction	ko04080	Neuroactive ligand-receptor interaction	34	3	27	0	0	8	0	0	0	0	0	0	0	10	0	0.278146
-	-	-	Fatty acid elongation in mitochondria	15	91	36	0	73	0	2	6	0	0	71	0	14	277	40	0.282172
-	-	-	1,1,1-Trichloro-2,2-bis(4-chlorophenyl)ethane (DDT) degradation	662	430	1869	705	622	2271	266	677	41	0	0	0	1874	528	0	0.284437
-	-	-	Ubiquitin system	7089	3372	11253	2965	3746	8461	14643	17575	13039	10892	5629	7170	5677	4878	4974	0.284859
Organismal Systems	Digestive System	ko04973	Carbohydrate digestion and absorption	2304	3474	4685	1048	4114	6001	3819	11017	337	274	595	654	4263	7415	701	0.290994
Genetic Information Processing	Folding, Sorting and Degradation	ko04141	Protein processing in endoplasmic reticulum	21321	20297	33552	7974	21850	31725	27748	23993	14165	11119	6471	10438	27261	38083	5887	0.292263
-	-	-	Amino acid metabolism	71272	63740	118070	32881	68785	94759	128579	87545	79728	67521	35726	49339	84405	120384	32957	0.292711
-	-	-	Photosynthesis proteins	107904	125775	174141	50289	131892	362907	205585	170742	131058	100702	54844	78517	165024	238985	49599	0.292809
Metabolism	Metabolism Of Terpenoids and Polyketides	ko01056	Biosynthesis of type II polyketide backbone	106	40	357	0	38	49	0	23	0	0	0	0	0	93	0	0.297794
-	-	-	Prenyltransferases	94772	97465	150050	49880	103193	140220	154672	164204	95089	79491	46773	66042	126896	185476	41647	0.303918
Cellular Processes	Transport and Catabolism	ko04146	Peroxisome	92955	61435	152557	50765	70971	102048	190516	130429	131279	110793	57836	84018	96362	119406	54084	0.310073
Human Diseases	Cardiovascular Disease	ko05410	Hypertrophic cardiomyopathy (HCM)	548	153	730	238	303	158	1406	48	22	101	456	2	138	386	110	0.312401
Human Diseases	Neurodegenerative Disease	ko05020	Prion diseases	3843	2213	6274	1758	2859	4400	3264	1079	269	279	621	1389	4112	4490	335	0.321493
Environmental Information Processing	Signal Transduction	ko04070	Phosphatidylinositol signaling system	31539	28405	49494	17307	31402	40099	64035	50498	39754	33421	17256	26239	38335	56675	15931	0.321612
Metabolism	Xenobiotics Biodegradation and Metabolism	ko00980	Metabolism of xenobiotics by cytochrome P450	65410	23899	103515	37400	35634	80798	169590	67901	105053	88597	45283	64758	50704	49315	41244	0.327258
Metabolism	Global and Overview Maps	ko01212	Fatty acid metabolism	269145	123772	453368	134000	166654	306357	574882	308852	404012	342456	169681	240207	261446	247390	158205	0.328318
Metabolism	Metabolism Of Terpenoids and Polyketides	ko00903	Limonene and pinene degradation	143172	63481	245221	73129	88412	160244	303416	156911	208570	176703	87952	122577	151409	126450	82226	0.33281
Metabolism	Energy Metabolism	ko00195	Photosynthesis	96915	120281	152028	45093	124178	298247	181615	158013	115311	89685	49802	70404	153779	228307	44663	0.333527
Metabolism	Carbohydrate Metabolism	ko00660	C5-Branched dibasic acid metabolism	95300	86941	151478	50718	91288	116190	182962	136249	118687	100353	55034	77570	116456	160282	50086	0.33607
Organismal Systems	Digestive System	ko04978	Mineral absorption	7077	3625	10553	3582	4286	14488	17646	8366	13389	10899	5046	8211	6362	6333	5098	0.338005
Metabolism	Xenobiotics Biodegradation and Metabolism	ko00642	Ethylbenzene degradation	30511	18128	51803	14214	22852	31818	62973	30618	39291	33400	17224	24948	32604	35205	16021	0.339264
Metabolism	Amino Acid Metabolism	ko00290	Valine, leucine and isoleucine biosynthesis	223531	213422	353028	119441	225815	279146	420490	342335	264828	223758	122773	175307	284814	406059	111587	0.348696
Metabolism	Xenobiotics Biodegradation and Metabolism	ko00626	Naphthalene degradation	96527	61789	162986	47628	77220	127181	195393	108708	131276	111160	57229	79721	122758	119712	52451	0.350979
Metabolism	Biosynthesis Of Other Secondary Metabolites	ko00311	Penicillin and cephalosporin biosynthesis	21105	10779	31509	10878	13747	18136	35011	18023	26301	21999	12997	16411	17221	21790	10672	0.353215
Metabolism	Energy Metabolism	ko00190	Oxidative phosphorylation	427986	355624	670569	241970	385839	508434	917102	653461	631897	534096	287690	407903	473381	676361	263475	0.370757
Metabolism	Metabolism Of Cofactors and Vitamins	ko00740	Riboflavin metabolism	80387	69620	130262	45051	75243	107446	182269	136353	131548	111290	58966	83743	94944	125463	54128	0.373742
Metabolism	Xenobiotics Biodegradation and Metabolism	ko00930	Caprolactam degradation	90755	32412	156262	46999	50449	99521	203654	98352	142827	121420	60633	84140	87371	68391	55950	0.37414
Human Diseases	Infectious Disease: Bacterial	ko05150	Staphylococcus aureus infection	4888	8393	8896	3365	10588	2622	13218	6204	12719	10840	4912	8101	10046	23371	4846	0.385152
Metabolism	Metabolism Of Cofactors and Vitamins	ko00780	Biotin metabolism	45195	45919	72351	24666	48123	59887	95095	96944	66083	55579	29678	43250	60127	87599	27933	0.391376
Metabolism	Amino Acid Metabolism	ko00280	Valine, leucine and isoleucine degradation	309990	127975	524042	175495	178339	313124	722563	338264	506817	432549	213604	302089	268892	264904	200775	0.397027
-	-	-	Glycosyltransferases	111434	94495	181632	62369	104241	166410	271892	210238	210104	176064	88377	125439	133193	171899	83987	0.397258
Metabolism	Xenobiotics Biodegradation and Metabolism	ko00621	Dioxin degradation	28622	20538	51238	8907	26333	42888	40987	15253	26569	21821	11348	15754	38256	39679	10072	0.398865
-	-	-	Cellular antigens	22168	13579	35730	13437	16859	24507	57786	29877	39171	33018	16878	23635	20149	26638	15323	0.400225
Metabolism	Metabolism Of Cofactors and Vitamins	ko00790	Folate biosynthesis	137960	121930	214499	75511	131905	165337	295846	240789	210616	178123	91802	134723	163570	233168	86257	0.402388
Human Diseases	Infectious Disease: Bacterial	ko05110	Vibrio cholerae infection	324	25	211	14	29	119	104	0	3	0	71	0	32	152	40	0.404097
Metabolism	Amino Acid Metabolism	ko00310	Lysine degradation	171693	74137	289320	97631	100166	176659	411404	224138	298404	254025	123128	176274	156259	149112	116999	0.405458
Metabolism	Carbohydrate Metabolism	ko00630	Glyoxylate and dicarboxylate metabolism	253565	181232	416019	136879	213306	270358	543281	300397	366678	310475	156487	232307	273916	363826	147164	0.40962
Human Diseases	Drug Resistance: Antimicrobial	ko01501	beta-Lactam resistance	12480	10162	18190	5460	11672	13292	20955	12490	13403	11003	6727	9125	14761	19171	5132	0.409985
Metabolism	Carbohydrate Metabolism	ko00650	Butanoate metabolism	354186	229083	600250	184289	278362	392027	780471	444250	546926	463915	232416	331341	392462	460619	217331	0.413145
Metabolism	Biosynthesis Of Other Secondary Metabolites	ko00941	Flavonoid biosynthesis	6528	2825	10631	2381	3609	12628	14839	6351	13244	10745	5627	6840	4734	5086	4909	0.414456
Metabolism	Carbohydrate Metabolism	ko00640	Propanoate metabolism	328902	201092	547836	175920	247011	350135	720888	392026	507851	432322	215551	304792	350139	406813	201732	0.417775
Metabolism	Glycan Biosynthesis and Metabolism	ko00513	Various types of N-glycan biosynthesis	176	219	73	0	162	91	42	331	0	0	0	0	122	302	0	0.418057
Genetic Information Processing	Transcription	ko03040	Spliceosome	0	8	0	0	0	0	0	280	0	0	0	0	0	0	0	0.420486
Metabolism	Metabolism Of Cofactors and Vitamins	ko00770	Pantothenate and CoA biosynthesis	171277	184684	271846	87129	195261	218259	321162	283053	199155	167836	91463	131571	237082	355285	82756	0.421015
Metabolism	Carbohydrate Metabolism	ko00010	Glycolysis / Gluconeogenesis	327161	339074	527209	174103	363417	428075	571850	476495	359854	304961	169535	236436	455721	656086	154716	0.421691
-	-	-	Nucleotide metabolism	11856	13270	19392	2613	13963	16484	8955	13530	318	412	1262	1655	16739	24921	742	0.426903
Metabolism	Metabolism Of Cofactors and Vitamins	ko00860	Porphyrin and chlorophyll metabolism	281819	263994	471078	172053	279290	455554	690821	451816	501743	421026	211780	309137	359212	500248	208482	0.434302
Genetic Information Processing	Folding, Sorting and Degradation	ko03050	Proteasome	12150	13272	21150	5432	14269	17850	17534	26038	13357	11152	5969	8781	19181	25614	6139	0.434329
Organismal Systems	Digestive System	ko04975	Fat digestion and absorption	0	0	0	0	0	20	0	0	0	0	0	0	0	0	0	0.434614
Environmental Information Processing	Signaling Molecules and Interaction	ko04512	ECM-receptor interaction	0	0	67	0	0	0	0	0	0	0	0	0	0	0	0	0.434614
Environmental Information Processing	Signal Transduction	ko04340	Hedgehog signaling pathway	0	0	2	0	0	0	0	0	0	0	0	0	0	0	0	0.434614
-	-	-	CAM ligands	0	0	67	0	0	0	0	0	0	0	0	0	0	0	0	0.434614
-	-	-	GTP-binding proteins	0	0	2	0	0	0	0	0	0	0	0	0	0	0	0	0.434614
Metabolism	Carbohydrate Metabolism	ko00620	Pyruvate metabolism	362085	327600	590210	189345	362571	444315	735901	492771	499347	422687	214521	314288	460075	643745	201186	0.437302
Metabolism	Lipid Metabolism	ko00592	alpha-Linolenic acid metabolism	13413	4737	21275	6625	6415	15195	33006	20827	25896	21926	10532	16110	10230	8367	10242	0.438045
Metabolism	Metabolism Of Other Amino Acids	ko00410	beta-Alanine metabolism	167000	90354	279090	85886	116219	191904	394388	202817	285518	241741	115811	164510	178688	179631	110858	0.438255
Metabolism	Xenobiotics Biodegradation and Metabolism	ko00982	Drug metabolism - cytochrome P450	68864	25021	109586	41559	37380	84051	195277	74721	130468	110306	54670	78014	53619	51146	50963	0.4385
Metabolism	Energy Metabolism	ko00720	Carbon fixation pathways in prokaryotes	339265	305968	554705	183361	331458	383244	696165	508505	485094	411597	215226	304906	422435	593845	198919	0.446904
Genetic Information Processing	Replication and Repair	ko03410	Base excision repair	136234	131663	216876	70904	140626	161908	267708	219698	183783	156451	85202	118644	178779	250959	77273	0.447384
Human Diseases	Endocrine and Metabolic Disease	ko04930	Type II diabetes mellitus	11143	13782	18664	6206	15175	21443	21844	15763	13613	11237	5789	8532	18337	26385	5607	0.44763
-	-	-	Sesquiterpenoid biosynthesis	82	6	71	0	7	16	0	0	0	0	0	0	0	51	0	0.449842
Metabolism	Amino Acid Metabolism	ko00360	Phenylalanine metabolism	131505	72753	222357	70299	92825	138208	302179	142256	220811	186546	91824	132856	125164	143908	86908	0.450338
Metabolism	Amino Acid Metabolism	ko00380	Tryptophan metabolism	215464	92373	362391	121407	125677	221581	520213	265198	388610	330402	159477	229138	192522	185953	152464	0.452868
Environmental Information Processing	Membrane Transport	ko02060	Phosphotransferase system (PTS)	72104	167508	112783	37880	186665	115186	196088	111325	166791	144776	68941	100412	215982	388670	71023	0.454011
Metabolism	Metabolism Of Other Amino Acids	ko00480	Glutathione metabolism	139555	76600	217262	87029	96687	162334	382847	186047	261415	220779	110612	162681	124375	152810	104507	0.458427
Human Diseases	Endocrine and Metabolic Disease	ko04940	Type I diabetes mellitus	14285	16535	23090	6842	17610	22457	23001	24276	13555	11369	6637	9121	22874	32334	6147	0.458594
Organismal Systems	Endocrine System	ko04910	Insulin signaling pathway	22165	23788	33565	8984	26359	38270	37160	35049	27051	22148	11657	16750	31666	47980	10716	0.463566
-	-	-	Lipid biosynthesis proteins	258559	192707	420016	141194	221430	311202	589606	343792	430095	364519	180790	260199	295780	376427	171636	0.468355
Metabolism	Xenobiotics Biodegradation and Metabolism	ko00362	Benzoate degradation	209337	106220	355726	106336	144093	227006	480221	208587	350401	296333	143725	202349	214252	216456	136700	0.472774
Metabolism	Metabolism Of Other Amino Acids	ko00450	Selenocompound metabolism	113077	114203	182665	56627	126519	136159	210129	168867	132119	112251	61135	86934	154555	230506	54923	0.473988
Human Diseases	Infectious Disease: Bacterial	ko05152	Tuberculosis	45395	45834	70541	25161	49466	75853	110801	76823	79346	66399	34683	48431	61343	89849	32052	0.495471
Cellular Processes	Cell Growth and Death	ko04112	Cell cycle - Caulobacter	142165	153808	219546	76354	165008	175536	316073	214151	185266	157786	84514	122463	197574	300503	75469	0.500716
Metabolism	Amino Acid Metabolism	ko00260	Glycine, serine and threonine metabolism	288687	256447	469068	170360	282233	335701	702898	429811	482801	409559	207508	296976	360895	491333	196236	0.501267
Genetic Information Processing	Folding, Sorting and Degradation	ko04122	Sulfur relay system	112076	86647	172240	60832	94788	133796	268359	188704	208665	176029	84486	129716	121035	165129	81382	0.503895
Metabolism	Biosynthesis Of Other Secondary Metabolites	ko00521	Streptomycin biosynthesis	85587	91997	134124	46242	100574	114092	160232	120907	106338	89270	48474	67960	119396	181671	44426	0.504269
-	-	-	Huntington's disease	30400	13493	46759	23082	18046	31521	99288	47037	65136	55227	27079	42874	22804	27361	25752	0.507999
Metabolism	Xenobiotics Biodegradation and Metabolism	ko00625	Chloroalkane and chloroalkene degradation	100082	70490	168232	55071	85266	123736	229784	113681	169364	143072	68838	98294	125697	138824	65550	0.513726
-	-	-	Energy metabolism	282097	273274	458306	139722	297867	318409	539320	398157	380159	320434	162474	242483	373925	535506	150797	0.514011
Metabolism	Energy Metabolism	ko00920	Sulfur metabolism	104891	81466	166421	58545	90412	120065	254915	172530	195090	165217	81941	118576	114637	157751	77720	0.522163
Metabolism	Metabolism Of Terpenoids and Polyketides	ko00281	Geraniol degradation	135953	49197	228377	72976	71685	146574	332355	154912	258602	219747	105218	149133	126395	99722	101098	0.523837
Metabolism	Energy Metabolism	ko00680	Methane metabolism	324411	366687	530964	158108	383093	411658	553784	471070	358412	301654	161168	237032	481596	704089	148662	0.524122
Metabolism	Xenobiotics Biodegradation and Metabolism	ko00627	Aminobenzoate degradation	158184	71465	269267	79195	99977	175762	378931	163379	284863	241277	117726	166131	158400	145282	112354	0.524841
Metabolism	Xenobiotics Biodegradation and Metabolism	ko00623	Toluene degradation	70448	41645	123155	35882	50567	83845	166326	88342	130157	109785	56076	79028	75889	77952	52761	0.530748
-	-	-	Replication, recombination and repair proteins	212148	229139	325004	107528	244556	285192	475673	321714	316311	264965	135711	196062	295863	441644	126711	0.535704
Metabolism	Xenobiotics Biodegradation and Metabolism	ko00624	Polycyclic aromatic hydrocarbon degradation	53174	42655	93140	25529	50726	74975	107999	57159	78687	66106	33789	45908	79126	82847	32228	0.537732
Metabolism	Energy Metabolism	ko00910	Nitrogen metabolism	249174	222690	405538	130817	244385	282817	575077	383864	416578	352331	175316	256032	310570	433943	166989	0.539476
Metabolism	Lipid Metabolism	ko00072	Synthesis and degradation of ketone bodies	54956	21632	92179	34180	31284	50622	140278	59980	103586	88396	42837	62237	47381	46342	40240	0.539704
-	-	-	Cell division	23467	23299	36014	13637	25268	27942	59423	38215	39259	33136	16546	25571	31113	44710	15638	0.547387
Metabolism	Metabolism Of Terpenoids and Polyketides	ko00900	Terpenoid backbone biosynthesis	156210	175527	247505	84668	188388	208823	294064	253789	198805	168487	90684	129707	235596	344644	83427	0.549119
-	-	-	Alzheimer's disease	28035	19441	43994	22446	23035	28824	96445	58114	64664	55123	26555	40607	28512	38762	25420	0.5503
Metabolism	Lipid Metabolism	ko00564	Glycerophospholipid metabolism	166699	165812	262783	91614	178016	194311	343372	224574	236059	200900	106903	152012	216436	320392	99065	0.551524
-	-	-	Protein folding and associated processing	243137	209125	374463	144513	233300	312209	621977	434429	470293	396279	197335	290635	292016	411792	188858	0.557766
-	-	-	Others	318340	274492	522892	176062	302295	419212	785184	481583	613041	517632	254807	364813	385489	517033	243683	0.563862
Genetic Information Processing	Folding, Sorting and Degradation	ko03060	Protein export	158638	182826	243037	85375	192746	201231	309132	284334	211119	179471	97666	139615	232846	357221	89219	0.571858
Metabolism	Carbohydrate Metabolism	ko00562	Inositol phosphate metabolism	69754	36398	112332	44672	47441	69583	197637	84243	142162	121914	61226	83346	59198	71753	58746	0.576873
Metabolism	Metabolism Of Cofactors and Vitamins	ko00730	Thiamine metabolism	115581	142678	184215	57329	146077	146751	189878	181442	120671	101761	57798	82964	178648	271158	51471	0.577307
Genetic Information Processing	Folding, Sorting and Degradation	ko03018	RNA degradation	125458	140619	196159	72322	149095	177937	280181	207644	197896	166802	86698	126360	181994	273295	81084	0.579987
Metabolism	Lipid Metabolism	ko01040	Biosynthesis of unsaturated fatty acids	97511	50380	151866	56018	61469	106375	258257	140590	206887	175741	83841	119048	89457	95796	80802	0.580614
Genetic Information Processing	Translation	ko00970	Aminoacyl-tRNA biosynthesis	293550	349509	454304	159558	368976	389708	561600	507694	370368	313866	172216	246060	449170	686555	156851	0.580883
Metabolism	Lipid Metabolism	ko00590	Arachidonic acid metabolism	26727	11293	42864	15064	15904	26891	67787	23007	51903	43813	21489	30595	19479	23403	20206	0.581633
Metabolism	Metabolism Of Cofactors and Vitamins	ko00760	Nicotinate and nicotinamide metabolism	128648	132625	201418	72257	145927	163999	296046	214427	209505	177902	91808	130947	180643	260372	86049	0.584486
Metabolism	Metabolism Of Terpenoids and Polyketides	ko01055	Biosynthesis of vancomycin group antibiotics	14980	17684	22938	6836	19508	19374	22639	21173	13466	11143	6742	8736	22258	36320	5625	0.586852
-	-	-	Peptidases	472282	538856	746818	242926	572043	632368	946899	699555	647886	546822	291872	410035	688026	1049953	265332	0.591725
Metabolism	Lipid Metabolism	ko00120	Primary bile acid biosynthesis	7195	8249	12355	4236	8496	7252	25651	6909	25459	21630	9628	13591	11888	16087	9740	0.593838
Cellular Processes	Cellular Community - Eukaryotes	ko04510	Focal adhesion	12	5	103	0	3	0	0	0	0	0	0	0	0	34	0	0.594715
Human Diseases	Cancer: Specific Types	ko05220	Chronic myeloid leukemia	8	1	80	0	1	0	0	0	0	0	0	0	8	16	0	0.598708
Environmental Information Processing	Signal Transduction	ko04330	Notch signaling pathway	8	1	80	0	1	0	0	0	0	0	0	0	8	16	0	0.598708
Environmental Information Processing	Signal Transduction	ko04310	Wnt signaling pathway	8	1	80	0	1	0	0	0	0	0	0	0	8	16	0	0.598708
-	-	-	Electron transfer carriers	9396	13027	19133	2898	13198	15019	8553	17086	442	383	1375	1117	18825	28360	705	0.604347
Metabolism	Nucleotide Metabolism	ko00230	Purine metabolism	602195	666037	941585	335723	716456	765353	1331408	1043235	931822	789316	412172	594524	879028	1307495	385316	0.604652
Metabolism	Lipid Metabolism	ko00061	Fatty acid biosynthesis	166372	143396	264906	98968	157625	191619	406780	222816	299407	254259	124752	181002	199338	282432	118388	0.607453
-	-	-	Germination	11952	7979	20518	858	6772	3782	436	248	16	320	30	168	8009	15144	254	0.607567
Metabolism	Amino Acid Metabolism	ko00340	Histidine metabolism	188179	191226	301271	111155	207553	227120	426613	314292	313462	266379	135103	192741	265781	376136	128371	0.609209
Metabolism	Metabolism Of Other Amino Acids	ko00473	D-Alanine metabolism	29293	34043	46224	14699	36300	32804	47270	42363	26757	22866	13861	19328	42780	69187	12356	0.611921
-	-	-	DNA repair and recombination proteins	728490	824394	1142205	405000	868242	941152	1544025	1221188	1116110	946593	495231	715992	1058804	1584632	462433	0.614114
Metabolism	Carbohydrate Metabolism	ko00053	Ascorbate and aldarate metabolism	61354	43408	99709	35779	55861	72528	153375	75126	116606	99221	48405	67737	70684	90929	46364	0.618119
Metabolism	Amino Acid Metabolism	ko00350	Tyrosine metabolism	152981	118242	247657	95228	138960	188534	407982	228367	311845	264533	128804	184433	184582	234417	123472	0.618482
Metabolism	Metabolism Of Other Amino Acids	ko00430	Taurine and hypotaurine metabolism	40008	36667	63607	21333	41597	48385	89383	51300	65152	54931	28036	39077	53354	73068	25593	0.619182
-	-	-	Restriction enzyme	36501	51823	55064	13836	50726	45408	17318	57486	1917	1195	5767	6191	61671	94797	3047	0.61952
Environmental Information Processing	Membrane Transport	ko02010	ABC transporters	1177229	1012159	1879063	654053	1152842	1405715	3005536	1498996	2154160	1828232	865259	1260102	1424972	2040441	861276	0.620742
Metabolism	Lipid Metabolism	ko00561	Glycerolipid metabolism	115477	120457	186741	67266	131381	148125	239840	148966	170438	145075	76403	104112	165674	236078	71778	0.623705
Human Diseases	Immune Disease	ko05340	Primary immunodeficiency	15550	14127	24501	8869	14999	17369	35155	20727	26112	22171	11927	16671	19543	25612	11111	0.626518
Metabolism	Lipid Metabolism	ko00121	Secondary bile acid biosynthesis	1814	6993	3493	414	6219	2510	635	628	93	22	189	189	8049	13067	27	0.626725
Metabolism	Xenobiotics Biodegradation and Metabolism	ko00364	Fluorobenzoate degradation	24357	7464	39457	12987	12577	31615	63531	17305	51930	43432	21279	28191	22398	13088	19842	0.626791
Organismal Systems	Environmental Adaptation	ko04626	Plant-pathogen interaction	40752	44075	60489	19930	47894	42798	85182	55708	52342	44879	23392	34702	55904	86874	21501	0.627741
-	-	-	Cytochrome P450	229	145	623	0	245	1065	40	4	16	0	0	0	841	195	0	0.633467
Metabolism	Amino Acid Metabolism	ko00250	Alanine, aspartate and glutamate metabolism	290772	321270	460386	154109	345261	353241	610638	446986	419935	355215	186525	264192	428590	635196	172906	0.636215
-	-	-	General function prediction only	1115961	1088586	1759292	631461	1177980	1361696	2621909	1681904	1985222	1678829	830503	1209231	1461731	2119144	794128	0.637846
-	-	-	Translation proteins	229413	261397	349928	132848	277083	300225	516718	396219	380106	321453	162813	241909	328438	506489	153556	0.63798
Metabolism	Metabolism Of Terpenoids and Polyketides	ko00253	Tetracycline biosynthesis	42499	41042	66596	26557	42594	50069	107084	62799	78396	66377	32636	48970	52732	80019	30365	0.640768
Genetic Information Processing	Replication and Repair	ko03420	Nucleotide excision repair	97325	114797	156112	50497	120483	121785	188520	160436	131478	111655	60566	84714	148997	223322	55762	0.641576
Genetic Information Processing	Transcription	ko03020	RNA polymerase	38613	48685	59752	20919	51191	54684	77167	69702	52956	44913	24242	35168	61739	95209	22366	0.643375
Metabolism	Xenobiotics Biodegradation and Metabolism	ko00622	Xylene degradation	21286	18396	38948	6447	22572	32165	33870	12540	26212	21667	10810	14144	31147	37689	9941	0.643673
Metabolism	Lipid Metabolism	ko00140	Steroid hormone biosynthesis	8608	5158	16951	6213	6514	12756	29717	15823	25795	21755	9549	13860	9611	9155	9791	0.644927
Human Diseases	Infectious Disease: Bacterial	ko05131	Shigellosis	12	25	110	0	27	24	0	0	0	0	0	0	10	73	0	0.645782
Metabolism	Glycan Biosynthesis and Metabolism	ko00540	Lipopolysaccharide biosynthesis	95359	69202	137788	61550	79756	106281	286616	181743	233113	196231	94598	140812	89848	124352	88645	0.646138
Metabolism	Glycan Biosynthesis and Metabolism	ko00550	Peptidoglycan biosynthesis	196680	238724	304432	105834	250639	251519	384854	321350	263884	223461	119953	173852	302767	463310	109687	0.649389
Metabolism	Amino Acid Metabolism	ko00300	Lysine biosynthesis	185950	231437	292564	102211	239157	231034	373711	305030	250289	212428	112956	162105	290534	444808	104524	0.650507
Genetic Information Processing	Replication and Repair	ko03430	Mismatch repair	184804	230363	289690	100199	237603	244742	372717	306385	263124	222768	117099	171532	286609	437306	108455	0.651996
Environmental Information Processing	Signal Transduction	ko04011	MAPK signaling pathway - yeast	11913	13843	18591	5855	15577	13612	24347	16049	13159	11134	5804	10240	17524	28837	5265	0.653567
Metabolism	Energy Metabolism	ko00710	Carbon fixation in photosynthetic organisms	145870	189966	232624	78965	203586	220280	291789	223831	186463	156319	81913	121893	242834	378749	76434	0.655289
Human Diseases	Cancer: Overview	ko05200	Pathways in cancer	17453	16824	28075	13244	19356	24284	57101	29562	39184	33059	15595	23350	23969	34873	15425	0.657954
-	-	-	Translation factors	122572	158051	188756	65837	166236	165950	235949	212385	158878	133992	72068	105628	197182	309103	66163	0.658946
Metabolism	Amino Acid Metabolism	ko00400	Phenylalanine, tyrosine and tryptophan biosynthesis	212285	239323	330790	125281	250023	266343	493143	375788	365832	309627	159008	228531	307251	459823	149861	0.660103
Genetic Information Processing	Translation	ko03010	Ribosome	531588	692588	821309	297171	721948	731076	1036940	952747	701775	594777	324069	468780	867076	1344752	297906	0.660601
Metabolism	Xenobiotics Biodegradation and Metabolism	ko00361	Chlorocyclohexane and chlorobenzene degradation	41359	14092	68752	19768	21670	51432	111592	33992	90599	75851	36273	51468	38640	24905	34741	0.664831
-	-	-	Metabolism of cofactors and vitamins	58668	39924	93527	36281	46603	68350	179818	104111	142032	120669	56168	83914	60798	77681	55595	0.667178
Genetic Information Processing	Replication and Repair	ko03030	DNA replication	149909	193127	233329	86449	200076	194328	302110	270954	210815	178914	94515	140330	240523	370646	88371	0.670087
Organismal Systems	Immune System	ko04640	Hematopoietic cell lineage	93	64	309	0	142	404	37	4	7	0	0	0	458	26	0	0.67023
-	-	-	Amino acid related enzymes	385993	439157	602995	220880	467046	482367	865370	659279	627976	531530	273328	395525	567922	865051	257196	0.672582
-	-	-	Chaperones and folding catalysts	293750	302119	448196	174035	322465	375940	740193	488433	561448	474129	236097	350234	393146	577836	225843	0.67488
Metabolism	Metabolism Of Cofactors and Vitamins	ko00750	Vitamin B6 metabolism	55415	59313	88218	34508	63311	67836	137569	101449	104425	88481	44199	64246	78376	116093	42673	0.678149
Human Diseases	Infectious Disease: Parasitic	ko05142	Chagas disease (American trypanosomiasis)	4061	1521	5950	3119	2145	3885	17922	9446	12906	11041	5472	7169	2733	2786	5036	0.678547
Metabolism	Amino Acid Metabolism	ko00270	Cysteine and methionine metabolism	252066	271671	398725	138219	287547	299622	562718	391088	417802	355066	179236	260058	351590	526679	170666	0.678869
Metabolism	Metabolism Of Other Amino Acids	ko00471	D-Glutamine and D-glutamate metabolism	38772	44747	59955	21136	47697	54022	85354	68056	65329	55401	28265	39372	60013	86872	26531	0.68307
Genetic Information Processing	Replication and Repair	ko03440	Homologous recombination	212615	271305	330323	120224	282128	284892	437671	389860	315842	267491	140058	205736	340478	523904	131819	0.685137
-	-	-	Ion channels	7156	6206	10960	5226	7121	9269	25588	8078	25828	21812	9913	14226	9545	13684	10182	0.687958
Metabolism	Nucleotide Metabolism	ko00240	Pyrimidine metabolism	405177	526912	634721	224052	551422	532447	802222	696275	541429	459148	247381	359207	663351	1027177	229055	0.694575
Human Diseases	Infectious Disease: Parasitic	ko05146	Amoebiasis	5464	3433	8824	2717	3565	5781	15297	8039	12870	10812	5231	7548	4269	6373	5116	0.700735
Metabolism	Metabolism Of Terpenoids and Polyketides	ko00523	Polyketide sugar unit biosynthesis	43710	56917	67949	24380	61355	63918	78628	61458	53570	44550	24313	34608	72082	112965	22136	0.703871
-	-	-	Chromosome	404602	450970	628177	224144	475696	515116	948511	622157	706260	596759	297167	447691	572495	866307	281256	0.707931
-	-	-	Transcription machinery	241988	268175	386895	132317	277225	277579	529337	385299	404119	343129	176781	249597	335153	518858	164679	0.709674
Genetic Information Processing	Replication and Repair	ko03450	Non-homologous end-joining	18029	5692	31207	8362	8010	13271	51419	14205	38310	32630	16148	21791	12558	11808	14768	0.711343
-	-	-	Signal transduction mechanisms	147223	141277	236365	84290	151770	193624	362486	202637	286914	243099	120365	176723	188373	270581	115262	0.717673
Metabolism	Metabolism Of Cofactors and Vitamins	ko00670	One carbon pool by folate	144909	181825	228651	88504	191402	187703	334330	256294	236130	200384	103393	149687	231827	355083	98032	0.718146
Human Diseases	Neurodegenerative Disease	ko05014	Amyotrophic lateral sclerosis (ALS)	14354	8756	24739	13001	10737	14758	54699	26145	38837	33347	15686	24070	16139	17600	15729	0.719977
-	-	-	Membrane and intracellular structural molecules	214887	163690	325599	132421	185506	223434	663064	331579	504796	426778	203641	308076	218867	309525	195655	0.727691
Metabolism	Glycan Biosynthesis and Metabolism	ko00601	Glycosphingolipid biosynthesis - lacto and neolacto series	8	155	199	0	143	41	850	0	63	0	0	189	206	324	0	0.730022
Cellular Processes	Cell Motility	ko02040	Flagellar assembly	194714	92101	293212	103980	119275	118309	579188	257634	436029	373092	175262	266654	127607	191070	169380	0.730263
-	-	-	Transporters	1954510	1946542	3092599	1072305	2150158	2351564	4808056	2427263	3454504	2936497	1423137	2040870	2641432	3913564	1400516	0.732186
Metabolism	Biosynthesis Of Other Secondary Metabolites	ko00940	Phenylpropanoid biosynthesis	31160	44262	49729	11900	45004	41900	34265	25819	14389	12022	10494	10888	53054	81935	6149	0.732272
-	-	-	Transcription related proteins	1941	2108	2882	1704	2026	2633	12415	4271	12807	10813	4497	6839	2363	3536	4821	0.737126
Metabolism	Xenobiotics Biodegradation and Metabolism	ko00983	Drug metabolism - other enzymes	70073	90191	112039	38553	94793	83314	139138	104501	92050	78316	43079	58109	116170	172917	39678	0.740029
Metabolism	Amino Acid Metabolism	ko00330	Arginine and proline metabolism	392605	377040	634694	238446	409396	484687	1037391	564347	805237	682069	327315	473477	520490	737744	320562	0.743445
Metabolism	Biosynthesis Of Other Secondary Metabolites	ko00401	Novobiocin biosynthesis	38528	40565	61322	24571	44236	47513	103963	67612	77921	65894	32741	47836	54453	81485	31458	0.744867
-	-	-	Cell motility and secretion	81984	55600	118805	45311	63336	85858	243049	128942	193820	163709	79697	117195	76033	107834	75841	0.753276
-	-	-	Ribosome Biogenesis	347021	405536	531143	210709	424101	433843	858202	637950	651949	554144	277211	413379	513299	780895	266913	0.755198
Organismal Systems	Circulatory System	ko04260	Cardiac muscle contraction	11944	3416	17659	10293	5323	8856	51660	23226	38449	32709	15020	24132	5786	7141	14787	0.756396
Metabolism	Carbohydrate Metabolism	ko00040	Pentose and glucuronate interconversions	132904	153675	212886	70159	165463	146851	240790	133508	157725	133918	75762	98516	198941	301598	66302	0.75742
-	-	-	Function unknown	510829	415078	796802	330376	471459	574836	1509280	839059	1204174	1021725	489111	718676	588012	812526	475079	0.761458
Metabolism	Metabolism Of Terpenoids and Polyketides	ko00908	Zeatin biosynthesis	10058	14637	15509	5669	15056	13685	19503	18590	13241	11200	6047	8791	18016	28153	5578	0.762188
Organismal Systems	Digestive System	ko04974	Protein digestion and absorption	2218	4583	3940	1702	4497	2576	2608	2622	212	107	589	485	5126	7940	110	0.762868
-	-	-	Glycan biosynthesis and metabolism	19195	11949	28062	11013	15267	21641	64169	32114	51530	43448	20223	31062	16166	24251	19852	0.767984
Metabolism	Glycan Biosynthesis and Metabolism	ko00511	Other glycan degradation	25064	67810	39248	13730	63522	32605	11558	15063	1896	1195	9272	5745	71255	121329	3615	0.781597
-	-	-	Parkinson's disease	14522	4393	22275	14635	7203	11082	74013	27357	51290	43725	20136	31384	8384	10111	19669	0.782201
-	-	-	Other ion-coupled transporters	361027	372975	584655	233617	384738	432109	1006184	635452	829269	706557	337275	488379	489467	681327	332678	0.788384
Cellular Processes	Cell Growth and Death	ko04115	p53 signaling pathway	2718	974	4803	4652	1894	2314	22529	5233	12841	11016	5045	7252	2657	2830	4842	0.789698
Metabolism	Glycan Biosynthesis and Metabolism	ko00531	Glycosaminoglycan degradation	6804	18721	10438	3631	17647	6466	2904	5166	505	194	2216	1683	18447	33397	588	0.792922
Genetic Information Processing	Translation	ko03013	RNA transport	26652	36524	38158	14142	35321	33373	47920	40209	39543	32991	16551	25751	41215	64555	15244	0.793077
-	-	-	Carbohydrate metabolism	38595	42683	64137	22123	44174	60046	91188	45143	78259	65950	33579	43363	55184	77205	31956	0.794648
-	-	-	DNA replication proteins	256096	346091	397417	148326	354057	339296	572234	444242	419793	355736	181929	271951	422611	658952	171486	0.796147
Metabolism	Xenobiotics Biodegradation and Metabolism	ko00363	Bisphenol degradation	47810	35393	87364	25053	44829	67616	113439	41425	90797	76310	36734	51166	78833	69130	35655	0.802099
-	-	-	Cytoskeleton proteins	74512	102286	117812	36689	103943	103630	158508	106251	105648	88789	46089	69098	126807	197044	42476	0.802851
Human Diseases	Infectious Disease: Parasitic	ko05140	Leishmaniasis	0	0	97	0	14	0	0	0	0	0	0	0	4	48	0	0.806852
Environmental Information Processing	Signal Transduction	ko04370	VEGF signaling pathway	0	0	97	0	14	0	0	0	0	0	0	0	4	48	0	0.806852
-	-	-	Bacterial toxins	27594	34067	45235	13971	37439	30321	31984	27447	14195	12641	11815	12558	43080	71708	9291	0.809055
Metabolism	Metabolism Of Other Amino Acids	ko00460	Cyanoamino acid metabolism	73242	83177	121396	38042	89597	95504	168215	88352	130183	110089	55870	77390	109709	159365	51355	0.822256
Metabolism	Carbohydrate Metabolism	ko00520	Amino sugar and nucleotide sugar metabolism	316541	422239	492814	165999	443490	402773	560766	459535	384007	326218	188906	249314	526043	842753	166025	0.822884
Metabolism	Carbohydrate Metabolism	ko00030	Pentose phosphate pathway	206743	252315	331898	128673	270857	280950	501931	321437	379090	321716	162686	231964	325666	500899	156205	0.823059
-	-	-	Protein kinases	144250	94732	223290	80310	105754	178697	420145	190592	362112	306480	148195	211619	135099	180342	145174	0.823703
Genetic Information Processing	Translation	ko03008	Ribosome biogenesis in eukaryotes	16479	15182	24939	9915	16284	18524	46192	32117	38737	32842	15492	24294	20387	29507	15558	0.826262
Metabolism	Glycan Biosynthesis and Metabolism	ko00604	Glycosphingolipid biosynthesis - ganglio series	5164	13521	7923	2779	12685	5027	2105	3559	399	152	1612	1082	13135	23755	518	0.831679
Metabolism	Biosynthesis Of Other Secondary Metabolites	ko00960	Tropane, piperidine and pyridine alkaloid biosynthesis	42398	37908	70762	28043	43037	58255	126712	64642	103397	87477	41521	60330	60904	73175	41059	0.832694
Metabolism	Xenobiotics Biodegradation and Metabolism	ko00791	Atrazine degradation	23315	10060	38319	14814	13045	31553	90028	39173	77169	64785	28981	43868	22670	18623	29314	0.833195
-	-	-	Sporulation	68579	149949	117862	3621	130278	58640	5566	26395	502	718	1331	1436	153636	273096	1265	0.835111
-	-	-	Secretion system	559666	385575	847158	338850	453689	602416	1859729	864370	1505952	1277831	597377	883194	535672	770171	588660	0.839958
-	-	-	Bacterial motility proteins	510679	248527	752073	302187	311553	423028	1679475	729722	1387219	1179223	541064	826196	353091	509685	535524	0.84056
-	-	-	Inorganic ion transport and metabolism	104071	68892	164060	70912	82743	107076	360003	185928	296143	250869	118286	175744	106972	134975	115491	0.840764
Metabolism	Lipid Metabolism	ko00591	Linoleic acid metabolism	24748	24104	44980	13450	28155	34769	53107	20856	39099	32873	16045	22494	47071	46707	15258	0.845338
-	-	-	Pores ion channels	154095	104728	239616	114787	124380	190775	582279	262391	479121	403751	189923	284725	150013	196738	184898	0.845613
Environmental Information Processing	Signal Transduction	ko02020	Two-component system	684363	445623	1065064	425273	514088	740364	2203441	958084	1842571	1564156	725418	1076090	639549	868634	718529	0.851363
Human Diseases	Cancer: Specific Types	ko05222	Small cell lung cancer	2659	934	4794	4108	1856	2226	21555	4243	12841	11016	5045	7252	2577	2878	4842	0.8605
Human Diseases	Infectious Disease: Viral	ko05164	Influenza A	2705	942	4693	4108	1845	2234	21555	4243	12841	11016	5045	7252	2573	2874	4842	0.861584
-	-	-	Other transporters	72793	77639	116736	48084	84819	95886	206331	120661	168997	142929	68030	102423	101164	154819	66721	0.863284
Human Diseases	Cardiovascular Disease	ko05416	Viral myocarditis	2671	939	4666	4108	1845	2226	21555	4243	12841	11016	5045	7252	2573	2864	4842	0.863297
Human Diseases	Infectious Disease: Parasitic	ko05145	Toxoplasmosis	2659	934	4630	4108	1847	2226	21555	4243	12841	11016	5045	7252	2573	2830	4842	0.863364
Human Diseases	Cancer: Specific Types	ko05210	Colorectal cancer	2659	934	4630	4108	1842	2226	21555	4243	12841	11016	5045	7252	2573	2830	4842	0.863515
-	-	-	Lipid metabolism	38823	40710	63065	28120	45504	55758	157723	62070	141343	119611	54499	77843	57075	79813	54686	0.866843
-	-	-	Transcription factors	472367	483758	749949	274193	525577	538729	1325076	678404	1032924	880874	421791	604434	641524	943672	409062	0.870027
Organismal Systems	Nervous System	ko04724	Glutamatergic synapse	25714	30242	42084	18479	32221	36005	82307	49126	64827	54748	25489	37382	41304	59878	25621	0.870535
Human Diseases	Infectious Disease: Bacterial	ko05120	Epithelial cell signaling in Helicobacter pylori infection	13384	23203	19943	7749	22780	20328	32462	21757	26163	21887	10035	16330	28205	43720	9967	0.87433
-	-	-	Glycosylphosphatidylinositol(GPI)-anchor biosynthesis	79	90	35	0	51	8	0	0	0	0	0	0	61	95	0	0.876161
Metabolism	Biosynthesis Of Other Secondary Metabolites	ko00944	Flavone and flavonol biosynthesis	717	1415	846	365	1322	464	228	985	15	30	385	123	1535	2530	0	0.879548
Metabolism	Carbohydrate Metabolism	ko00051	Fructose and mannose metabolism	185007	288049	301368	103725	303425	274768	447760	281814	351333	298638	146322	207245	374495	583682	142769	0.882371
Environmental Information Processing	Membrane Transport	ko03070	Bacterial secretion system	240183	195132	372980	154878	225876	272889	856779	404245	681574	578854	275141	399015	264382	386907	269651	0.88345
-	-	-	Glycosphingolipid biosynthesis - globo series	13776	28104	19137	5317	26627	10978	5932	4953	533	164	2740	1463	29139	49855	521	0.885929
Human Diseases	Cancer: Specific Types	ko05215	Prostate cancer	7306	12120	10909	3707	12428	11442	16443	10115	13133	10825	5001	8053	14878	23647	5079	0.886785
-	-	-	Butirosin and neomycin biosynthesis	13866	19922	21420	6468	20706	17633	20374	16850	13394	11186	6699	9077	23500	40278	5718	0.893487
Metabolism	Carbohydrate Metabolism	ko00500	Starch and sucrose metabolism	189857	276165	300174	92443	283193	260115	356571	274722	263665	223075	124184	162099	333300	529100	110809	0.895896
-	-	-	Lipopolysaccharide biosynthesis proteins	125123	97052	182322	92415	109807	137745	454516	237536	399176	337084	156274	232752	124620	174012	152121	0.900501
Cellular Processes	Transport and Catabolism	ko04142	Lysosome	12408	26894	19020	8222	25837	12575	6684	10143	913	672	5256	3111	27858	48213	2128	0.90282
Organismal Systems	Endocrine System	ko04914	Progesterone-mediated oocyte maturation	7306	11773	10752	3707	12063	11316	16443	10115	13133	10825	5001	8053	14448	22942	5079	0.905847
Organismal Systems	Immune System	ko04612	Antigen processing and presentation	7306	11773	10752	3707	12063	11316	16443	10115	13133	10825	5001	8053	14448	22942	5079	0.905847
Organismal Systems	Immune System	ko04621	NOD-like receptor signaling pathway	7392	11914	11013	3707	12209	11361	16621	10159	13206	10825	5001	8242	14658	23174	5081	0.907767
-	-	-	Biosynthesis and biodegradation of secondary metabolites	24206	20793	45079	17736	24096	34550	109816	45230	102440	86808	37813	55565	33322	40206	38837	0.918633
Metabolism	Metabolism Of Other Amino Acids	ko00440	Phosphonate and phosphinate metabolism	18689	16068	31139	13670	19371	17951	76423	30102	63899	54527	24353	36703	22825	34273	24931	0.922276
Human Diseases	Cardiovascular Disease	ko05414	Dilated cardiomyopathy (DCM)	12	5	36	0	3	0	0	0	0	0	0	0	0	34	0	0.934994
Human Diseases	Cardiovascular Disease	ko05412	Arrhythmogenic right ventricular cardiomyopathy (ARVC)	12	5	36	0	3	0	0	0	0	0	0	0	0	34	0	0.934994
Human Diseases	Infectious Disease: Bacterial	ko05130	Pathogenic Escherichia coli infection	12	5	36	0	3	0	0	0	0	0	0	0	0	34	0	0.934994
Cellular Processes	Cell Motility	ko04810	Regulation of actin cytoskeleton	12	5	36	0	3	0	0	0	0	0	0	0	0	34	0	0.934994
Organismal Systems	Sensory System	ko04745	Phototransduction - fly	12	5	36	0	3	0	0	0	0	0	0	0	0	34	0	0.934994
Organismal Systems	Immune System	ko04670	Leukocyte transendothelial migration	12	5	36	0	3	0	0	0	0	0	0	0	0	34	0	0.934994
Cellular Processes	Cellular Community - Eukaryotes	ko04530	Tight junction	12	5	36	0	3	0	0	0	0	0	0	0	0	34	0	0.934994
Cellular Processes	Cellular Community - Eukaryotes	ko04520	Adherens junction	12	5	36	0	3	0	0	0	0	0	0	0	0	34	0	0.934994
Cellular Processes	Transport and Catabolism	ko04145	Phagosome	12	5	36	0	3	0	0	0	0	0	0	0	0	34	0	0.934994
Metabolism	Metabolism Of Terpenoids and Polyketides	ko01051	Biosynthesis of ansamycins	19390	31998	32720	10470	34155	27505	39768	30569	26174	22102	10950	16862	40300	64379	10454	0.942212
Cellular Processes	Cell Growth and Death	ko04210	Apoptosis	3971	1812	5965	5815	2779	3028	34643	9938	25535	21777	9895	14315	4205	4651	9648	0.94644
Human Diseases	Infectious Disease: Bacterial	ko05133	Pertussis	14896	8831	24570	14573	12337	22772	79660	26022	76834	65110	28114	41623	13288	15128	28993	0.946964
Metabolism	Xenobiotics Biodegradation and Metabolism	ko00643	Styrene degradation	38511	15369	65314	26886	22660	35225	145515	46073	128031	108482	48458	70108	30560	34495	48698	0.950211
Metabolism	Lipid Metabolism	ko00600	Sphingolipid metabolism	24338	49148	39074	13189	46563	26177	25664	21900	13749	11438	10100	8668	53716	87360	6490	0.951245
-	-	-	Vibrio cholerae pathogenic cycle	28049	22313	42709	19241	24860	36512	110581	48932	103037	87017	38715	58861	28437	43632	39877	0.952882
-	-	-	G protein-coupled receptors	0	18	0	0	38	13	18	14	0	0	0	0	37	33	0	0.956319
Human Diseases	Infectious Disease: Parasitic	ko05143	African trypanosomiasis	4748	2212	7605	4538	2652	4175	28566	12116	25563	21720	9498	13789	3919	4190	9738	0.960863
Metabolism	Carbohydrate Metabolism	ko00052	Galactose metabolism	122762	207457	186084	54068	209612	145426	166548	139537	94117	80094	54988	65647	246936	407354	43093	0.964394
Cellular Processes	Cell Motility	ko02030	Bacterial chemotaxis	185115	110261	280383	119708	131219	127204	669974	262618	562731	480415	217591	327863	146320	222632	217806	0.971926
Metabolism	Biosynthesis Of Other Secondary Metabolites	ko00950	Isoquinoline alkaloid biosynthesis	17799	17130	28743	12644	19204	21053	62464	27138	51457	43564	20360	29160	24303	33274	19689	0.976017
Human Diseases	Immune Disease	ko05322	Systemic lupus erythematosus	88	113	407	68	95	66	15	61	0	1	71	0	149	359	40	0.977888

## Sheet: Supplementary  Table S7
Supplementary Table S7 Predicted the functional pathways by Tax4Fun (Sequence by primers 27F-338R)
Pathway level1	Pathway level2	Pathway level3	Description	p16_positive1	p16_positive2	p16_positive3	p16_positive4	p16_positive5	p16_positive6	p16_positive7	p16_positive8	p16_positive9	p16_negative1	p16_negative2	p16_negative3	p16_negative4	p16_negative5	p16_negative6	p-value
Human Diseases	Cancer: overview	ko05204	Chemical carcinogenesis	0.000873945	0.000846475	0.000841858	0.000775898	0.000735146	0.000939286	0.000549683	0.00074333	0.00101788	0.000863477	0.000783054	0.000817783	0.000792674	0.000726924	0.000636745	0.494167
Human Diseases	Cancer: overview	ko05200	Pathways in cancer	0.000359729	0.000461461	0.000387007	0.000357182	0.000369444	0.000372632	0.000347964	0.000316766	0.000370518	0.000349191	0.000360001	0.000358223	0.000357638	0.000346856	0.000310288	0.212577
Human Diseases	Cancer: overview	ko05202	Transcriptional misregulation in cancer	2.2e-06	1.11e-06	1.27e-06	1.89e-06	2.37e-06	2.3e-06	1.07e-06	2.24e-06	1.71e-06	2.76e-06	1.85e-06	1.95e-06	1.86e-06	1.09e-06	1.79e-06	0.627853
Human Diseases	Cancer: overview	ko05203	Viral carcinogenesis	0.000266	0.000251	0.000247	0.000258	0.000274	0.000268	0.000275	0.000276	0.000235	0.000226	0.000207	0.000259	0.000242	0.000229	0.000249	0.00949043
Human Diseases	Cancer: specific types	ko05219	Bladder cancer	0.000120251	6.58e-05	9.47e-05	0.000123389	0.000104518	9.95e-05	0.000111334	0.00012619	9.36e-05	0.000115092	0.000121344	0.00012066	0.00012285	9.9e-05	0.000121919	0.975547
Human Diseases	Cancer: specific types	ko05220	Chronic myeloid leukemia	2.73e-06	1.52e-06	1.82e-06	2.28e-06	2.53e-06	3.95e-06	1.76e-06	2.71e-06	2.97e-06	2.68e-06	2.25e-06	2.38e-06	2.36e-06	2.2e-06	2.51e-06	0.105638
Human Diseases	Cancer: specific types	ko05210	Colorectal cancer	7.16e-06	1.51e-05	3.52e-06	1.84e-06	1.45e-05	2.27e-05	6.57e-06	1.7e-05	1.75e-05	7.63e-06	1.95e-06	3.92e-06	2.43e-06	8.62e-06	1.07e-05	0.00384193
Human Diseases	Cancer: specific types	ko05215	Prostate cancer	0.000132923	0.00017797	0.000165192	0.000139627	0.000121159	0.000105882	0.000101912	8.34e-05	0.000135525	0.000129447	0.000141875	0.000138353	0.00013878	0.000110115	8.76e-05	0.00453901
Human Diseases	Cancer: specific types	ko05211	Renal cell carcinoma	0.000213997	0.000262768	0.000214072	0.000210681	0.000228158	0.000237074	0.000233292	0.000207804	0.000212007	0.000207122	0.000211216	0.000210872	0.000211302	0.00022199	0.000203609	0.808709
Human Diseases	Cancer: specific types	ko05222	Small cell lung cancer	1.01e-05	1.92e-05	5.93e-06	4.6e-06	1.76e-05	2.57e-05	1.1e-05	2.29e-05	2.01e-05	9.94e-06	4.66e-06	6.62e-06	5.19e-06	1.26e-05	1.66e-05	0.00179203
Metabolism	Amino acid metabolism	ko00250	Alanine, aspartate and glutamate metabolism	0.0104548	0.0132693	0.0108878	0.01035	0.0114404	0.0109683	0.0117061	0.011118	0.0112544	0.010507	0.0103836	0.0105225	0.0103619	0.0117269	0.0111523	0.434851
Metabolism	Amino acid metabolism	ko00330	Arginine and proline metabolism	0.0215708	0.0223438	0.0204354	0.0216069	0.0194903	0.0195846	0.0171622	0.0183852	0.0198896	0.0214824	0.0215624	0.021628	0.0215915	0.0179398	0.018143	0.00264953
Metabolism	Amino acid metabolism	ko00270	Cysteine and methionine metabolism	0.00982385	0.0105895	0.0106108	0.00962104	0.0117058	0.011313	0.011464	0.0112537	0.0111088	0.00970548	0.00967941	0.00977326	0.00964182	0.0115481	0.0113373	0.000688484
Metabolism	Amino acid metabolism	ko00260	Glycine, serine and threonine metabolism	0.015298	0.0160676	0.0145601	0.0150767	0.0147199	0.0151569	0.0132419	0.0146312	0.0148856	0.0158	0.0150635	0.0152373	0.0150706	0.0135106	0.0139107	0.112058
Metabolism	Amino acid metabolism	ko00340	Histidine metabolism	0.00744282	0.00869318	0.00789875	0.00686436	0.008638	0.00933537	0.00757552	0.0079364	0.00933251	0.00749753	0.00693595	0.00714933	0.00695727	0.00801627	0.00780711	0.0209731
Metabolism	Amino acid metabolism	ko00300	Lysine biosynthesis	0.00731711	0.00925717	0.00791479	0.0070922	0.00938914	0.00898151	0.0101813	0.00964588	0.0086535	0.00752411	0.00713236	0.00734161	0.00710938	0.00994579	0.00976895	0.00471165
Metabolism	Amino acid metabolism	ko00310	Lysine degradation	0.00540691	0.00647169	0.00578362	0.00511845	0.00567656	0.00598344	0.00490386	0.00499729	0.00620756	0.00536601	0.00517418	0.00529828	0.00516703	0.00531193	0.00494128	0.988881
Metabolism	Amino acid metabolism	ko00360	Phenylalanine metabolism	0.00572457	0.00551365	0.00573243	0.00538788	0.00575332	0.00606725	0.00466498	0.00548836	0.00601286	0.00591567	0.0054228	0.00568141	0.00541626	0.00560322	0.00516639	0.704089
Metabolism	Amino acid metabolism	ko00400	Phenylalanine, tyrosine and tryptophan biosynthesis	0.0103022	0.0117441	0.0111983	0.01016	0.0108847	0.0107883	0.00995249	0.0101498	0.0116306	0.0103183	0.0102311	0.0103491	0.0101768	0.0106485	0.0104901	0.794831
Metabolism	Amino acid metabolism	ko00380	Tryptophan metabolism	0.00261693	0.00318845	0.00282767	0.00241063	0.00270568	0.00290456	0.00210783	0.00236504	0.003116	0.00264622	0.00244628	0.00252841	0.00243328	0.00243532	0.00214824	0.74554
Metabolism	Amino acid metabolism	ko00350	Tyrosine metabolism	0.00587692	0.00567504	0.00558054	0.00581433	0.00571122	0.0058717	0.00570753	0.00591334	0.00562554	0.00606355	0.00579722	0.00586576	0.00581961	0.00583511	0.00580603	0.538726
Metabolism	Amino acid metabolism	ko00290	Valine, leucine and isoleucine biosynthesis	0.00520118	0.00641889	0.00530954	0.00513155	0.00501501	0.00510526	0.00429841	0.00474751	0.00540652	0.00519168	0.0051476	0.0052268	0.00514045	0.00484872	0.00472839	0.0881901
Metabolism	Amino acid metabolism	ko00280	Valine, leucine and isoleucine degradation	0.00605152	0.00744758	0.00591148	0.00535877	0.00677424	0.00747394	0.00506422	0.00611786	0.00701671	0.00615607	0.00540696	0.00580367	0.0054522	0.00614021	0.00571895	0.33799
Metabolism	Biosynthesis of other secondary metabolites	ko00965	Betalain biosynthesis	1.27e-05	8.46e-06	1.05e-05	1.3e-05	1.08e-05	1.48e-05	8.3e-06	1.05e-05	9.65e-06	1.36e-05	1.29e-05	1.34e-05	1.29e-05	8.7e-06	1.01e-05	0.331576
Metabolism	Biosynthesis of other secondary metabolites	ko00232	Caffeine metabolism	0.00015361	0.000144924	0.000141096	0.000141027	0.000100823	0.000143669	9.39e-05	0.000132081	0.000147875	0.000151051	0.000141568	0.000146048	0.000142862	0.000115776	0.00011924	0.0438083
Metabolism	Biosynthesis of other secondary metabolites	ko00331	Clavulanic acid biosynthesis	2.27e-05	1.21e-05	1.89e-05	2.47e-05	8.73e-06	8.21e-06	1.03e-05	9.27e-06	1.1e-05	2.1e-05	2.44e-05	2.39e-05	2.44e-05	1.07e-05	1.14e-05	0.000476565
Metabolism	Biosynthesis of other secondary metabolites	ko00944	Flavone and flavonol biosynthesis	2.8e-05	1.44e-05	2.66e-05	2.77e-05	1.55e-05	1.87e-05	2.99e-05	3.24e-05	2.83e-05	2.46e-05	2.75e-05	2.69e-05	2.81e-05	2.97e-05	3.4e-05	0.867569
Metabolism	Biosynthesis of other secondary metabolites	ko00941	Flavonoid biosynthesis	6.5e-06	4.11e-06	1.26e-05	5.61e-06	2.97e-05	2.22e-05	2.06e-05	2.16e-05	1.18e-05	6.69e-06	5.93e-06	8.3e-06	5.69e-06	2.5e-05	2.55e-05	0.00180781
Metabolism	Biosynthesis of other secondary metabolites	ko00901	Indole alkaloid biosynthesis	6.02e-05	4.8e-05	4.62e-05	6.76e-05	2.51e-05	2.49e-05	1.86e-05	2.27e-05	2.98e-05	5.63e-05	6.64e-05	6.52e-05	6.67e-05	2.2e-05	2.39e-05	0.000249323
Metabolism	Biosynthesis of other secondary metabolites	ko00943	Isoflavonoid biosynthesis	7.17e-06	2.45e-06	9.82e-06	3.22e-06	3.66e-05	3e-05	2.2e-05	2.9e-05	1.89e-05	4.95e-06	3.52e-06	2.92e-06	3.2e-06	1.67e-05	2.7e-05	4.11e-06
Metabolism	Biosynthesis of other secondary metabolites	ko00950	Isoquinoline alkaloid biosynthesis	0.000256841	0.000309534	0.000263082	0.000251115	0.000261542	0.000276134	0.000264864	0.000269313	0.000257753	0.000250637	0.000252136	0.000261967	0.000251813	0.000294369	0.000265981	0.981928
Metabolism	Biosynthesis of other secondary metabolites	ko00524	Neomycin, kanamycin and gentamicin biosynthesis	0.000203035	0.000112688	0.000220498	0.000204106	0.000278216	0.00024162	0.000333299	0.000319242	0.000252985	0.000211223	0.000204028	0.000196874	0.000203673	0.000288239	0.000328387	0.00192549
Metabolism	Biosynthesis of other secondary metabolites	ko00401	Novobiocin biosynthesis	0.000642834	0.000968267	0.000756577	0.000597052	0.000842113	0.000818864	0.00078713	0.000794023	0.000863718	0.000663332	0.000607235	0.000625358	0.000601398	0.000814483	0.000802063	0.0406731
Metabolism	Biosynthesis of other secondary metabolites	ko00311	Penicillin and cephalosporin biosynthesis	0.00152738	0.000949668	0.00164996	0.00138089	0.00154782	0.00167383	0.00150047	0.00161439	0.00193302	0.00151982	0.00139962	0.00141342	0.00140198	0.00160753	0.00153977	0.0565076
Metabolism	Biosynthesis of other secondary metabolites	ko00940	Phenylpropanoid biosynthesis	0.000981633	0.000455603	0.00110692	0.000855994	0.00106814	0.00117038	0.00102047	0.0011554	0.0014321	0.000883735	0.000872138	0.000853856	0.000879161	0.00104114	0.00111806	0.00794224
Metabolism	Biosynthesis of other secondary metabolites	ko00945	Stilbenoid, diarylheptanoid and gingerol biosynthesis	0.000239396	0.00019901	0.00025342	0.000210088	0.000326836	0.000335879	0.000219381	0.000268555	0.000296828	0.000242753	0.000213165	0.000230299	0.000213539	0.000277055	0.000250614	0.0125377
Metabolism	Biosynthesis of other secondary metabolites	ko00521	Streptomycin biosynthesis	0.00201411	0.00184133	0.00193989	0.00198064	0.00212932	0.00215954	0.00216486	0.00226907	0.00216941	0.00205975	0.00197523	0.00193553	0.0019874	0.00202313	0.00226508	1.32e-05
Metabolism	Biosynthesis of other secondary metabolites	ko00960	Tropane, piperidine and pyridine alkaloid biosynthesis	0.00132256	0.00126251	0.00120786	0.00125545	0.00128549	0.00143904	0.00102789	0.00120061	0.00134482	0.00135745	0.00125414	0.00127481	0.00126593	0.00111722	0.00111283	0.700256
Metabolism	Carbohydrate metabolism	ko00520	Amino sugar and nucleotide sugar metabolism	0.0155229	0.0144339	0.0159051	0.0155694	0.017821	0.0166334	0.0195682	0.0187259	0.0161403	0.0154334	0.015555	0.0154449	0.0155807	0.0183436	0.0191593	0.00333801
Metabolism	Carbohydrate metabolism	ko00053	Ascorbate and aldarate metabolism	0.00442337	0.00326915	0.00433523	0.00443474	0.00345707	0.00367104	0.00338352	0.00386118	0.00401601	0.00431896	0.00443106	0.00443041	0.00444569	0.00371582	0.00382602	0.0216843
Metabolism	Carbohydrate metabolism	ko00650	Butanoate metabolism	0.00849223	0.00816932	0.00809582	0.00823493	0.00845131	0.00908545	0.00748744	0.0082156	0.00826647	0.00868178	0.00823392	0.00841714	0.00826489	0.00803348	0.00786466	0.753269
Metabolism	Carbohydrate metabolism	ko00660	C5-Branched dibasic acid metabolism	0.00177114	0.00184834	0.00170548	0.00176808	0.0016854	0.00166497	0.00144557	0.00156921	0.00169892	0.00176415	0.00176541	0.00176846	0.00176703	0.0015443	0.00152471	0.00910053
Metabolism	Carbohydrate metabolism	ko00020	Citrate cycle (TCA cycle)	0.00605761	0.00693665	0.00626136	0.00598079	0.00605057	0.0060847	0.00516157	0.00519871	0.00608107	0.00606074	0.00601092	0.00603911	0.00598849	0.005361	0.00504197	0.0673406
Metabolism	Carbohydrate metabolism	ko00051	Fructose and mannose metabolism	0.0137122	0.0106686	0.0130286	0.0141223	0.01348	0.0126687	0.014856	0.0145992	0.0123181	0.0140586	0.0140308	0.0138056	0.0140646	0.0139997	0.0147677	0.638885
Metabolism	Carbohydrate metabolism	ko00052	Galactose metabolism	0.00613081	0.0040996	0.0061346	0.00631847	0.00726482	0.00634718	0.00980944	0.00936906	0.00625193	0.00608188	0.00626562	0.00618203	0.0063015	0.00882937	0.00965191	0.0258501
Metabolism	Carbohydrate metabolism	ko00010	Glycolysis / Gluconeogenesis	0.00936856	0.00980249	0.00964827	0.00952783	0.0112299	0.0102146	0.0133088	0.0123355	0.00961121	0.00927408	0.00950585	0.00952433	0.00949763	0.0123977	0.0125789	0.0163206
Metabolism	Carbohydrate metabolism	ko00630	Glyoxylate and dicarboxylate metabolism	0.0128446	0.014332	0.0117529	0.0127852	0.0114201	0.0121478	0.00888494	0.0100967	0.0112717	0.012961	0.0127476	0.0128338	0.0127875	0.00971916	0.00950392	0.0101303
Metabolism	Carbohydrate metabolism	ko00562	Inositol phosphate metabolism	0.00228563	0.00170579	0.0021443	0.00212749	0.00286038	0.0030102	0.00261133	0.00288184	0.00265331	0.00252773	0.00212708	0.00212175	0.00214692	0.00244323	0.00281734	6.54e-05
Metabolism	Carbohydrate metabolism	ko00040	Pentose and glucuronate interconversions	0.00882345	0.00554372	0.00782504	0.00919741	0.00627269	0.00626048	0.00661516	0.00703253	0.00694975	0.00859926	0.00911712	0.00878519	0.00916338	0.00635387	0.0068356	0.0196858
Metabolism	Carbohydrate metabolism	ko00030	Pentose phosphate pathway	0.0106606	0.00856999	0.01046	0.0108509	0.0103768	0.00994284	0.0112101	0.0110224	0.0100888	0.0106021	0.0108232	0.0107239	0.0108202	0.0108933	0.0109687	0.753411
Metabolism	Carbohydrate metabolism	ko00640	Propanoate metabolism	0.00681105	0.00831728	0.00639883	0.00683361	0.00589767	0.00632702	0.00492732	0.00536108	0.00591464	0.00658701	0.00681907	0.00686372	0.00683929	0.00543282	0.00523134	0.00569082
Metabolism	Carbohydrate metabolism	ko00620	Pyruvate metabolism	0.0136311	0.014206	0.0133853	0.0136353	0.0131951	0.0129888	0.0127899	0.0128796	0.0130601	0.0136143	0.013627	0.0136315	0.0136353	0.0129078	0.0127144	0.000838533
Metabolism	Carbohydrate metabolism	ko00500	Starch and sucrose metabolism	0.0196321	0.0132618	0.0198415	0.0205186	0.0179559	0.0162266	0.0198426	0.0188054	0.018073	0.0192224	0.020445	0.0196522	0.0204258	0.0185609	0.0192383	0.503014
Human Diseases	Cardiovascular disease	ko05412	Arrhythmogenic right ventricular cardiomyopathy (ARVC)	1.35e-06	7.46e-07	1.04e-06	1.56e-06	2.19e-07	2.36e-07	3.54e-07	2.92e-07	4.13e-07	1.2e-06	1.53e-06	1.43e-06	1.54e-06	3.43e-07	4.38e-07	0.000264318
Human Diseases	Cardiovascular disease	ko05414	Dilated cardiomyopathy (DCM)	1.35e-06	7.46e-07	1.04e-06	1.56e-06	2.19e-07	2.36e-07	3.54e-07	2.92e-07	4.13e-07	1.2e-06	1.53e-06	1.43e-06	1.54e-06	3.43e-07	4.38e-07	0.000264318
Human Diseases	Cardiovascular disease	ko05410	Hypertrophic cardiomyopathy (HCM)	2.41e-05	4.42e-06	5.85e-05	7.17e-06	6.47e-05	5.69e-05	4.99e-05	5.34e-05	0.00010837	2.76e-05	1.06e-05	1.19e-05	9.26e-06	5.19e-05	3.78e-05	0.00476942
Human Diseases	Cardiovascular disease	ko05416	Viral myocarditis	7.16e-06	1.51e-05	3.52e-06	1.84e-06	1.45e-05	2.27e-05	6.57e-06	1.7e-05	1.75e-05	7.63e-06	1.95e-06	3.92e-06	2.43e-06	8.62e-06	1.07e-05	0.00384193
Cellular Processes	Cell growth and death	ko04210	Apoptosis	0.000304155	0.000572072	0.000400945	0.000271235	0.000286235	0.000335838	0.000245113	0.000264955	0.000391714	0.000269912	0.000281429	0.000299356	0.000275541	0.000346168	0.000243461	0.377719
Cellular Processes	Cell growth and death	ko04112	Cell cycle - Caulobacter	0.0140234	0.0139204	0.0136817	0.0136368	0.014665	0.015527	0.0132307	0.0135439	0.0148029	0.013882	0.0136465	0.0137219	0.0137158	0.0134264	0.0134815	0.153502
Cellular Processes	Cell growth and death	ko04113	Meiosis - yeast	0.0010101	0.000708034	0.000926628	0.00099386	0.00114039	0.00131138	0.000867004	0.000960671	0.00104743	0.00103972	0.000991331	0.000967544	0.000997436	0.000829783	0.000847966	0.24383
Cellular Processes	Cell growth and death	ko04115	p53 signaling pathway	8.78e-06	1.53e-05	6.25e-06	1.84e-06	1.77e-05	2.71e-05	8.64e-06	2.03e-05	2.42e-05	9.08e-06	2.14e-06	4.18e-06	2.7e-06	1.13e-05	1.3e-05	0.00169667
Cellular Processes	Cell motility	ko02030	Bacterial chemotaxis	0.014507	0.00900952	0.0128051	0.0149419	0.00983349	0.0110477	0.00801619	0.0086587	0.0121268	0.0137937	0.0148405	0.0141013	0.0149327	0.00793789	0.00876136	0.019255
Cellular Processes	Cell motility	ko02040	Flagellar assembly	0.0143876	0.00821858	0.0124674	0.0148593	0.0108503	0.0114424	0.0083595	0.00889811	0.0111408	0.0141468	0.0147416	0.0139024	0.0148107	0.0076555	0.00893551	0.040802
Cellular Processes	Cell motility	ko04810	Regulation of actin cytoskeleton	1.35e-06	7.46e-07	1.04e-06	1.56e-06	2.19e-07	2.36e-07	3.54e-07	2.92e-07	4.13e-07	1.2e-06	1.53e-06	1.43e-06	1.54e-06	3.43e-07	4.38e-07	0.000264318
Cellular Processes	Cellular community - eukaryotes	ko04510	Focal adhesion	2.6e-05	2.02e-05	2.1e-05	2.95e-05	7.88e-06	8.08e-06	1.05e-05	1.13e-05	9.9e-06	2.34e-05	2.9e-05	2.76e-05	2.92e-05	1.08e-05	1.23e-05	0.000109625
Cellular Processes	Cellular community - prokaryotes	ko05111	Biofilm formation - Vibrio cholerae	0.00726737	0.00559024	0.00697871	0.00770982	0.00422752	0.00456108	0.00401197	0.0038969	0.00535507	0.00754143	0.00768954	0.00757151	0.00765982	0.00466944	0.00398444	0.000120102
Organismal Systems	Circulatory system	ko04260	Cardiac muscle contraction	9.51e-05	0.000177914	0.00011119	8.49e-05	0.000121234	0.000119983	0.000120736	0.000111096	0.000136859	0.000105312	8.67e-05	8.75e-05	8.61e-05	0.000109218	0.000103349	0.289416
Organismal Systems	Digestive system	ko04976	Bile secretion	7.28e-05	4.1e-05	5.21e-05	5.09e-05	9.31e-05	0.000114507	7.71e-05	0.000108576	0.000122067	7.21e-05	5.09e-05	5.89e-05	5.48e-05	9.31e-05	8.31e-05	0.000691251
Organismal Systems	Digestive system	ko04973	Carbohydrate digestion and absorption	0.000506215	0.000302043	0.000511467	0.000567519	0.000368316	0.000335928	0.000660053	0.000638161	0.000362654	0.000479676	0.000559031	0.000552494	0.000560836	0.000643367	0.000750839	0.989401
Organismal Systems	Digestive system	ko04975	Fat digestion and absorption	4.05e-07	2.15e-07	1.82e-07	2.68e-07	8.27e-07	6.27e-07	1.94e-07	5.58e-07	7.62e-07	8.01e-07	2.63e-07	4.7e-07	2.67e-07	3.69e-07	1.98e-07	0.182587
Organismal Systems	Digestive system	ko04971	Gastric acid secretion	7.84e-06	4.84e-06	8.18e-06	7.23e-06	2.02e-05	1.55e-05	4.7e-05	3.44e-05	1.47e-05	7.68e-06	7.06e-06	7.49e-06	7.35e-06	3.71e-05	3.18e-05	0.013558
Organismal Systems	Digestive system	ko04978	Mineral absorption	0.0002434	0.000206033	0.000227625	0.000253818	0.000242365	0.000222117	0.000233828	0.000207206	0.000182977	0.000239579	0.000252185	0.000247154	0.000252601	0.000223891	0.000218225	0.0504158
Organismal Systems	Digestive system	ko04972	Pancreatic secretion	1.5e-05	8.69e-06	1.42e-05	1.48e-05	2.61e-05	1.91e-05	4.92e-05	3.77e-05	2.07e-05	1.5e-05	1.45e-05	1.57e-05	1.48e-05	4.12e-05	3.43e-05	0.0210052
Organismal Systems	Digestive system	ko04974	Protein digestion and absorption	0.000317308	7.32e-05	0.000791037	0.000109861	0.000706322	0.000791064	0.000815531	0.000701129	0.0013339	0.000341204	0.000155374	0.000130349	0.000140411	0.00068035	0.000638574	0.0019951
Organismal Systems	Digestive system	ko04970	Salivary secretion	7.84e-06	4.84e-06	8.18e-06	7.23e-06	2.02e-05	1.55e-05	4.7e-05	3.44e-05	1.47e-05	7.68e-06	7.06e-06	7.49e-06	7.35e-06	3.71e-05	3.18e-05	0.013558
Human Diseases	Endocrine and metabolic disease	ko04940	Type I diabetes mellitus	0.000267627	0.000305907	0.000279395	0.000257887	0.000372724	0.000352645	0.00039349	0.000381948	0.000333709	0.000287469	0.000258428	0.000270019	0.00025849	0.000372492	0.000380556	0.000219958
Human Diseases	Endocrine and metabolic disease	ko04930	Type II diabetes mellitus	0.000220901	0.000125539	0.000206801	0.000233231	0.000195064	0.000173302	0.000230809	0.000214279	0.00018375	0.0002157	0.000231198	0.000221905	0.000231537	0.00020179	0.000219567	0.659601
Organismal Systems	Endocrine system	ko04920	Adipocytokine signaling pathway	0.000548409	0.000921114	0.00052164	0.000508987	0.000635394	0.000653115	0.000364681	0.000464901	0.000604622	0.000543721	0.000511087	0.000538712	0.000513201	0.000472992	0.00041162	0.554203
Organismal Systems	Endocrine system	ko04912	GnRH signaling pathway	2.73e-05	1.51e-05	1.31e-05	1.94e-05	2.33e-05	2.71e-05	9.33e-06	2.9e-05	3.15e-05	2.38e-05	1.91e-05	2.01e-05	2.07e-05	1.39e-05	2.08e-05	0.200686
Organismal Systems	Endocrine system	ko04910	Insulin signaling pathway	0.00115813	0.000767304	0.00101241	0.00128957	0.000749273	0.000623322	0.000891315	0.000901772	0.000668986	0.00108631	0.00126936	0.00123083	0.0012733	0.000883905	0.000986664	0.00513294
Organismal Systems	Endocrine system	ko04916	Melanogenesis	7.83e-06	5.39e-06	6.07e-06	8.34e-06	3.62e-06	8.14e-06	3.2e-06	4.1e-06	4.21e-06	8.3e-06	8.2e-06	8.01e-06	8.26e-06	3.06e-06	4.16e-06	0.0229624
Organismal Systems	Endocrine system	ko03320	PPAR signaling pathway	0.00146239	0.00219767	0.00149918	0.00137053	0.00157679	0.00161231	0.00120933	0.00134777	0.00158871	0.00143931	0.00138207	0.00146201	0.00138257	0.00148841	0.00126976	0.491152
Organismal Systems	Endocrine system	ko04914	Progesterone-mediated oocyte maturation	0.000132919	0.00017797	0.000165187	0.000139627	0.000121159	0.000105882	0.000101912	8.34e-05	0.00013548	0.000129447	0.000141875	0.000138353	0.00013878	0.000110099	8.76e-05	0.00452983
Organismal Systems	Endocrine system	ko04614	Renin-angiotensin system	9.12e-05	9.5e-05	0.000263069	3.31e-05	0.000248107	0.000259076	0.000332125	0.000318922	0.000392228	9.87e-05	4.67e-05	6.2e-05	4.12e-05	0.000349824	0.000324801	0.00169147
Metabolism	Energy metabolism	ko00710	Carbon fixation in photosynthetic organisms	0.00343666	0.00384947	0.00346099	0.00334888	0.00426905	0.00410027	0.00450517	0.00445022	0.00377582	0.00352021	0.00334897	0.00341419	0.00335573	0.00427803	0.0044197	0.000686634
Metabolism	Energy metabolism	ko00720	Carbon fixation pathways in prokaryotes	0.00805763	0.00933378	0.00796232	0.007799	0.00837202	0.00864026	0.00725034	0.00770027	0.00839953	0.0079505	0.00781769	0.00796989	0.0078314	0.00774989	0.00737249	0.735504
Metabolism	Energy metabolism	ko00680	Methane metabolism	0.0107775	0.0117644	0.00994312	0.0109655	0.0106319	0.0108198	0.00974256	0.0100986	0.0104284	0.0105192	0.0109037	0.0109405	0.0109309	0.00983	0.00980796	0.114257
Metabolism	Energy metabolism	ko00910	Nitrogen metabolism	0.0220864	0.0238156	0.0204449	0.0225176	0.0173091	0.018721	0.0132883	0.0145413	0.0181767	0.0216326	0.0224429	0.0223003	0.0224814	0.0148748	0.0138027	0.00127373
Metabolism	Energy metabolism	ko00190	Oxidative phosphorylation	0.0141562	0.015188	0.0147744	0.0135449	0.0172826	0.0174741	0.0147002	0.0152696	0.0171281	0.0144152	0.013633	0.013798	0.0136135	0.0148955	0.0147844	0.00244355
Metabolism	Energy metabolism	ko00195	Photosynthesis	0.00168577	0.00238042	0.00193688	0.00157309	0.0024653	0.00235888	0.00282783	0.002688	0.00237635	0.00174125	0.00159044	0.00164866	0.0015834	0.00269576	0.00272031	0.00171236
Metabolism	Energy metabolism	ko00196	Photosynthesis - antenna proteins	4.54e-06	2.47e-06	5.65e-06	4.67e-06	2.2e-05	1.9e-05	2.23e-06	3.46e-06	4.94e-06	3.73e-06	4.77e-06	5.44e-06	4.67e-06	5.11e-06	2.5e-06	0.156545
Metabolism	Energy metabolism	ko00920	Sulfur metabolism	0.00549767	0.00512092	0.00587446	0.00543598	0.00537398	0.00545485	0.00444173	0.00444608	0.00558682	0.00552784	0.00547783	0.00547442	0.00544631	0.0048021	0.00434203	0.0615521
Organismal Systems	Environmental adaptation	ko04626	Plant-pathogen interaction	0.00254258	0.00268921	0.00288748	0.00249091	0.00250262	0.00251564	0.00270367	0.00255697	0.0029656	0.0025179	0.00251895	0.00248485	0.00250049	0.00267961	0.00256484	0.589142
Organismal Systems	Excretory system	ko04960	Aldosterone-regulated sodium reabsorption	7.84e-06	4.84e-06	8.18e-06	7.23e-06	2.02e-05	1.55e-05	4.7e-05	3.44e-05	1.47e-05	7.68e-06	7.06e-06	7.49e-06	7.35e-06	3.71e-05	3.18e-05	0.013558
Organismal Systems	Excretory system	ko04961	Endocrine and other factor-regulated calcium reabsorption	1.25e-05	7.5e-06	1.2e-05	1.26e-05	2.29e-05	1.7e-05	4.79e-05	3.58e-05	1.77e-05	1.22e-05	1.23e-05	1.26e-05	1.26e-05	3.85e-05	3.31e-05	0.020708
Organismal Systems	Excretory system	ko04964	Proximal tubule bicarbonate reclamation	0.000102846	7.67e-05	0.00010156	0.000100506	0.000115716	0.000122493	0.000115333	0.000101758	8.5e-05	0.000100573	0.000100725	0.000106209	0.0001014	0.00013044	0.000100685	0.541683
Organismal Systems	Excretory system	ko04962	Vasopressin-regulated water reabsorption	2.55e-05	1.93e-05	2.2e-05	2.63e-05	2.21e-05	1.63e-05	1.11e-05	1.39e-05	1.97e-05	2.42e-05	2.61e-05	2.57e-05	2.62e-05	1.29e-05	1.29e-05	0.00884626
Genetic Information Processing	Folding, sorting and degradation	ko03050	Proteasome	5.44e-05	4.77e-05	4.91e-05	5.6e-05	4.78e-05	4.19e-05	2.72e-05	3.2e-05	4.83e-05	5.26e-05	5.57e-05	5.6e-05	5.58e-05	3.42e-05	2.98e-05	0.00737425
Genetic Information Processing	Folding, sorting and degradation	ko03060	Protein export	0.00462689	0.00648493	0.00521022	0.00443313	0.00618673	0.00591226	0.00658261	0.00621115	0.00581721	0.00470555	0.00447253	0.00459598	0.00445403	0.00641403	0.00636571	0.00707685
Genetic Information Processing	Folding, sorting and degradation	ko04141	Protein processing in endoplasmic reticulum	0.000352119	0.0002949	0.000391958	0.000312881	0.000662427	0.000542644	0.000444044	0.000449179	0.000584233	0.000393437	0.000318339	0.000330761	0.00031761	0.000429022	0.000375903	0.00129611
Genetic Information Processing	Folding, sorting and degradation	ko03018	RNA degradation	0.0111479	0.0132221	0.0118793	0.0109003	0.0129172	0.0125747	0.0138661	0.0131891	0.0126373	0.0111575	0.0109528	0.0110252	0.0109267	0.0133538	0.0132834	0.00548818
Genetic Information Processing	Folding, sorting and degradation	ko04122	Sulfur relay system	0.00451777	0.00551041	0.00443346	0.00464748	0.00467866	0.00439981	0.00434528	0.00413786	0.00397035	0.00437928	0.00463578	0.00464529	0.00463289	0.00438385	0.00425823	0.0542235
Metabolism	Glycan biosynthesis and metabolism	ko00532	Glycosaminoglycan biosynthesis - chondroitin sulfate / dermatan sulfate	9.06e-05	6.79e-05	7.6e-05	8.67e-05	0.000131549	0.000116599	0.00014034	0.000148327	9.86e-05	8.28e-05	8.54e-05	8.7e-05	8.78e-05	0.000130958	0.00015308	0.000775873
Metabolism	Glycan biosynthesis and metabolism	ko00531	Glycosaminoglycan degradation	0.000349582	0.000180951	0.000474769	0.000316183	0.000340464	0.000380794	0.000536161	0.000587504	0.000579589	0.000342354	0.000323784	0.000320293	0.000322646	0.000550739	0.000624954	0.019506
Metabolism	Glycan biosynthesis and metabolism	ko00604	Glycosphingolipid biosynthesis - ganglio series	6.19e-05	3.55e-05	0.000124152	5.32e-05	9.43e-05	0.000104939	0.000187102	0.000187593	0.000155423	7.18e-05	5.65e-05	5.64e-05	5.46e-05	0.000180969	0.000213682	0.00653283
Metabolism	Glycan biosynthesis and metabolism	ko00603	Glycosphingolipid biosynthesis - globo and isoglobo series	0.000181528	0.000104596	0.000234164	0.000176168	0.000274302	0.000267856	0.000476873	0.000456616	0.000284569	0.000185427	0.000177024	0.000179095	0.000177466	0.000435495	0.000484108	0.00650773
Metabolism	Glycan biosynthesis and metabolism	ko00601	Glycosphingolipid biosynthesis - lacto and neolacto series	6.21e-05	4.17e-05	5.2e-05	6.61e-05	7.19e-05	6.22e-05	5.27e-05	4.34e-05	3.87e-05	7.57e-05	6.52e-05	6.37e-05	6.55e-05	4.52e-05	4.45e-05	0.247384
Metabolism	Glycan biosynthesis and metabolism	ko00563	Glycosylphosphatidylinositol (GPI)-anchor biosynthesis	5.41e-07	0	5.2e-08	0	7.33e-05	6.26e-07	6.84e-07	2.45e-06	1.26e-06	5.13e-07	0	0	0	5.09e-07	1.41e-06	0.195778
Metabolism	Glycan biosynthesis and metabolism	ko00540	Lipopolysaccharide biosynthesis	0.0101258	0.0105657	0.00976301	0.010561	0.00591287	0.00697647	0.00548253	0.00551607	0.00777985	0.00959526	0.0105463	0.0102291	0.0105443	0.00607327	0.00544703	0.000135555
Metabolism	Glycan biosynthesis and metabolism	ko00510	N-Glycan biosynthesis	0.000652093	0.000483736	0.000792593	0.000612879	0.00113547	0.00112333	0.000966054	0.00093613	0.000936528	0.000704689	0.000623036	0.000628902	0.00061875	0.000939454	0.00092193	0.000146084
Metabolism	Glycan biosynthesis and metabolism	ko00511	Other glycan degradation	0.00159046	0.000984973	0.00245474	0.00149377	0.00327235	0.00279921	0.00493719	0.00476862	0.00298626	0.00160677	0.00152179	0.00152569	0.00150913	0.00445467	0.00536002	0.00235202
Metabolism	Glycan biosynthesis and metabolism	ko00550	Peptidoglycan biosynthesis	0.0120762	0.0150584	0.0135242	0.0118228	0.0157084	0.014929	0.0176504	0.0167018	0.0137424	0.012319	0.0118901	0.0121035	0.0118468	0.0170427	0.0172868	0.00638473
Metabolism	Glycan biosynthesis and metabolism	ko00513	Various types of N-glycan biosynthesis	2.45e-06	2.65e-07	1.32e-07	1.87e-07	4.13e-06	6.1e-06	4.24e-08	3.33e-06	5.47e-06	1.44e-07	1.83e-07	1.72e-07	7.31e-07	1.53e-06	2.69e-06	0.00225402
Human Diseases	Immune disease	ko05340	Primary immunodeficiency	0.000488026	0.000491484	0.000532212	0.000477606	0.000500337	0.000504747	0.000631731	0.000576625	0.000500284	0.000476486	0.000480544	0.000496388	0.000479592	0.000655498	0.00059629	0.179933
Human Diseases	Immune disease	ko05322	Systemic lupus erythematosus	0.000108306	5.87e-05	8.1e-05	0.00012151	2.23e-05	2.34e-05	2.02e-05	2.57e-05	3.64e-05	9.72e-05	0.000119242	0.000113367	0.000119997	2.59e-05	2.42e-05	0.000252602
Organismal Systems	Immune system	ko04612	Antigen processing and presentation	0.000132919	0.00017797	0.000165187	0.000139627	0.000121159	0.000105882	0.000101912	8.34e-05	0.00013548	0.000129447	0.000141875	0.000138353	0.00013878	0.000110099	8.76e-05	0.00452983
Organismal Systems	Immune system	ko04610	Complement and coagulation cascades	8.05e-05	0.000228384	6.21e-05	8.61e-05	2.62e-05	3.7e-05	2.88e-05	3.78e-05	4.17e-05	7.04e-05	8.54e-05	8.35e-05	8.53e-05	3.78e-05	3.34e-05	0.0243595
Organismal Systems	Immune system	ko04666	Fc gamma R-mediated phagocytosis	2.73e-05	1.52e-05	1.32e-05	1.94e-05	2.6e-05	2.92e-05	1.2e-05	3.14e-05	3.22e-05	2.42e-05	1.91e-05	2.01e-05	2.07e-05	1.58e-05	2.33e-05	0.0625551
Organismal Systems	Immune system	ko04640	Hematopoietic cell lineage	4.2e-05	5.7e-06	0.000130953	5.37e-06	0.000106507	0.000126326	0.000147026	0.00013327	0.000227274	4.6e-05	1.34e-05	1.13e-05	1.08e-05	0.000134591	0.000121967	0.00200414
Organismal Systems	Immune system	ko04621	NOD-like receptor signaling pathway	0.000136396	0.000192896	0.000221772	0.000139903	0.000316922	0.000247371	0.000396285	0.000399036	0.000217765	0.000144693	0.000141875	0.000151783	0.00013878	0.00039059	0.000483501	0.00527772
Organismal Systems	Immune system	ko04622	RIG-I-like receptor signaling pathway	6.54e-05	4.63e-05	6.07e-05	6.82e-05	0.000137909	0.000114805	0.000179398	0.000178237	7.53e-05	9.68e-05	6.67e-05	6.91e-05	6.72e-05	0.000144055	0.000181382	0.00265521
Human Diseases	Infectious disease: bacterial	ko05100	Bacterial invasion of epithelial cells	0.00304996	0.00245761	0.00265346	0.00345988	0.00292917	0.00216497	0.00243232	0.00248231	0.0016547	0.00276954	0.00339903	0.00325562	0.00341013	0.00234389	0.00283591	0.0329015
Human Diseases	Infectious disease: bacterial	ko05120	Epithelial cell signaling in Helicobacter pylori infection	0.00183606	0.00134046	0.00162445	0.00197982	0.00123761	0.00126289	0.00129001	0.00133768	0.00111492	0.00178244	0.00195508	0.00191838	0.00196511	0.00133658	0.0015186	0.00165862
Human Diseases	Infectious disease: bacterial	ko05134	Legionellosis	0.0019422	0.00246436	0.00203986	0.00185071	0.00239176	0.00328882	0.00237345	0.00229963	0.00225423	0.001995	0.00186144	0.00193225	0.00186172	0.002439	0.00228497	0.0188968
Human Diseases	Infectious disease: bacterial	ko05130	Pathogenic Escherichia coli infection	0.000679375	0.000377161	0.000525049	0.000788264	0.000115837	0.00011007	0.000118531	0.000119852	0.000199902	0.000608956	0.000773666	0.000724173	0.000776981	0.000140733	0.000109965	0.000188126
Human Diseases	Infectious disease: bacterial	ko05133	Pertussis	0.0120742	0.00742043	0.0134747	0.0130162	0.00569034	0.00614536	0.0062905	0.00536249	0.00999387	0.0115877	0.0130995	0.0123844	0.012918	0.0071108	0.00534493	0.000895964
Human Diseases	Infectious disease: bacterial	ko05132	Salmonella infection	0.00371848	0.00273206	0.00307288	0.00408835	0.00158266	0.00166203	0.00123572	0.00133792	0.00184087	0.00338734	0.00403456	0.00386359	0.00405545	0.00144387	0.00132603	0.00019178
Human Diseases	Infectious disease: bacterial	ko05131	Shigellosis	0.00127091	0.000718827	0.00100004	0.00146416	0.000261218	0.000270059	0.000294813	0.000278071	0.000435221	0.00119362	0.00143868	0.00134541	0.00144377	0.00032377	0.000264657	0.000194242
Human Diseases	Infectious disease: bacterial	ko05150	Staphylococcus aureus infection	0.000770243	0.000598404	0.00110062	0.000731673	0.00238753	0.00194482	0.00351915	0.00293782	0.0014669	0.00087626	0.000735051	0.000741892	0.000730404	0.00274506	0.00321922	0.00108657
Human Diseases	Infectious disease: bacterial	ko05152	Tuberculosis	0.00125203	0.00146741	0.00133231	0.00122027	0.00147908	0.00144592	0.00158256	0.00153823	0.00147867	0.00125535	0.0012252	0.00124531	0.00122473	0.00155357	0.00154605	0.00203778
Human Diseases	Infectious disease: bacterial	ko05110	Vibrio cholerae infection	0.000217673	0.000108078	0.000346271	0.000214628	0.000227315	0.000240352	0.000234109	0.000179264	0.000356028	0.000219862	0.000224146	0.000205086	0.000214215	0.000212424	0.000180763	0.584259
Human Diseases	Infectious disease: parasitic	ko05143	African trypanosomiasis	0.00052008	0.000360068	0.000570748	0.000498988	0.000447611	0.000521115	0.000559282	0.000566013	0.0006235	0.000532456	0.000502328	0.000513757	0.000503627	0.000570559	0.000621095	0.172422
Human Diseases	Infectious disease: parasitic	ko05146	Amoebiasis	5.58e-05	0.000113489	0.000104233	4.34e-05	0.00018836	0.000165775	0.000130931	0.000120984	0.000215854	7.98e-05	4.71e-05	4.78e-05	4.39e-05	0.000111041	0.000115088	0.000490469
Human Diseases	Infectious disease: parasitic	ko05142	Chagas disease (American trypanosomiasis)	0.000429976	0.00022719	0.000464257	0.000392214	0.000355109	0.000429136	0.00033374	0.000346921	0.000564892	0.000447151	0.000398168	0.000389631	0.000398847	0.000316085	0.000315365	0.890495
Human Diseases	Infectious disease: parasitic	ko05140	Leishmaniasis	1.51e-07	5.97e-08	4.09e-09	0	5.25e-07	3.97e-07	2.03e-07	1.25e-06	2.38e-07	0	0	0	0	1.06e-07	5.07e-07	0.00218679
Human Diseases	Infectious disease: parasitic	ko05145	Toxoplasmosis	1.17e-05	1.74e-05	1.02e-05	6.58e-06	1.78e-05	2.51e-05	9.98e-06	1.94e-05	2.33e-05	1.22e-05	6.84e-06	8.27e-06	7.14e-06	1.16e-05	1.33e-05	0.00522881
Human Diseases	Infectious disease: viral	ko05169	Epstein-Barr virus infection	2.11e-07	1.16e-07	1.62e-07	2.43e-07	3.41e-08	1.16e-05	5.51e-08	4.57e-08	6.89e-08	1.87e-07	2.38e-07	2.23e-07	2.39e-07	5.87e-08	6.82e-08	0.265751
Human Diseases	Infectious disease: viral	ko05160	Hepatitis C	6.29e-09	2.53e-08	8.37e-08	5.25e-10	3.88e-07	1.98e-07	6.08e-07	6.28e-07	1.6e-07	2.2e-08	0	1.95e-08	0	5.32e-07	7.42e-07	0.00363187
Human Diseases	Infectious disease: viral	ko05168	Herpes simplex virus 1 infection	7.17e-06	1.52e-05	3.6e-06	1.84e-06	1.49e-05	2.29e-05	7.18e-06	1.76e-05	1.76e-05	7.65e-06	1.95e-06	3.94e-06	2.43e-06	9.15e-06	1.15e-05	0.00270717
Human Diseases	Infectious disease: viral	ko05164	Influenza A	3.22e-05	2.9e-05	2.52e-05	2.99e-05	2.54e-05	3.13e-05	1.53e-05	2.65e-05	3.15e-05	3.13e-05	2.96e-05	3.08e-05	3.01e-05	1.97e-05	2.11e-05	0.202954
Human Diseases	Infectious disease: viral	ko05162	Measles	6.29e-09	2.53e-08	8.37e-08	5.25e-10	3.88e-07	1.98e-07	6.08e-07	6.28e-07	1.6e-07	2.2e-08	0	1.95e-08	0	5.32e-07	7.42e-07	0.00363187
Metabolism	Lipid metabolism	ko00592	alpha-Linolenic acid metabolism	0.000288137	0.000500398	0.000371839	0.000277173	0.000254138	0.000267283	0.000234262	0.000212407	0.000354177	0.000273202	0.000284902	0.000291645	0.000279176	0.000293096	0.000200859	0.0972898
Metabolism	Lipid metabolism	ko00590	Arachidonic acid metabolism	0.000609221	0.000541511	0.000684291	0.000587923	0.00057944	0.000599834	0.000483311	0.000514652	0.000690734	0.000583869	0.000595785	0.000590858	0.000590814	0.000528306	0.000496245	0.365328
Metabolism	Lipid metabolism	ko01040	Biosynthesis of unsaturated fatty acids	0.00282276	0.00335627	0.00295319	0.00273997	0.00261029	0.0028118	0.00222277	0.00230877	0.00288412	0.00282556	0.00276235	0.00283526	0.00275266	0.00258412	0.0022421	0.0240434
Metabolism	Lipid metabolism	ko00565	Ether lipid metabolism	0.000236264	0.000210699	0.000370986	0.000203591	0.00026802	0.00030598	0.00031369	0.00029782	0.000398056	0.000270413	0.000214742	0.000224609	0.000209078	0.000368173	0.00031397	0.0777632
Metabolism	Lipid metabolism	ko00061	Fatty acid biosynthesis	0.0066451	0.00758329	0.00698433	0.00631845	0.00747738	0.008159	0.00742006	0.00754563	0.00762917	0.00672794	0.00636269	0.00654995	0.00635923	0.00772814	0.00756404	0.00376414
Metabolism	Lipid metabolism	ko00071	Fatty acid degradation	0.00474654	0.00603824	0.00455899	0.00462511	0.00390752	0.00435312	0.00295241	0.00338952	0.00437582	0.0045932	0.00463524	0.0047589	0.00464764	0.0037425	0.00317015	0.00661686
Metabolism	Lipid metabolism	ko00062	Fatty acid elongation	2.01e-05	1.08e-05	1.37e-05	1.39e-05	3.54e-05	2.81e-05	2.09e-05	3.39e-05	3.29e-05	1.89e-05	1.38e-05	1.66e-05	1.45e-05	2.54e-05	2.71e-05	0.000160718
Metabolism	Lipid metabolism	ko00561	Glycerolipid metabolism	0.00563866	0.00599363	0.00586771	0.00585223	0.00678478	0.00582958	0.00801358	0.00713805	0.00545984	0.00551595	0.00583574	0.00586467	0.00582287	0.00745302	0.00742754	0.0660292
Metabolism	Lipid metabolism	ko00564	Glycerophospholipid metabolism	0.0109836	0.0118837	0.0113944	0.0112721	0.0109902	0.0104566	0.0115078	0.0106611	0.0104827	0.0109246	0.0112831	0.0112301	0.0112332	0.0113966	0.0107205	0.0145007
Metabolism	Lipid metabolism	ko00591	Linoleic acid metabolism	0.00149765	0.00139534	0.00158288	0.00144627	0.00162409	0.00166563	0.0016029	0.00158933	0.00160949	0.00150661	0.00145666	0.00149326	0.0014522	0.00170131	0.00152855	0.0274385
Metabolism	Lipid metabolism	ko00120	Primary bile acid biosynthesis	0.000133333	0.000202214	0.000129637	0.000114287	0.00028048	0.000270008	0.000445415	0.000360075	0.000201469	0.000148707	0.000114159	0.000131042	0.000115796	0.00038028	0.000321499	0.00529914
Metabolism	Lipid metabolism	ko00121	Secondary bile acid biosynthesis	7.16e-05	5.15e-05	7.04e-05	5.15e-05	0.000241209	0.000235315	0.000415224	0.000321748	0.000155104	8.09e-05	5.13e-05	6.16e-05	5.38e-05	0.000329425	0.000289549	0.00173182
Metabolism	Lipid metabolism	ko00600	Sphingolipid metabolism	0.000972559	0.000580493	0.00100689	0.000936001	0.00104545	0.00117029	0.0013609	0.00139662	0.00110292	0.000978001	0.000935602	0.000953479	0.000942296	0.00140946	0.00140416	0.0162901
Metabolism	Lipid metabolism	ko00100	Steroid biosynthesis	5.45e-05	8.26e-05	4.98e-05	4.86e-05	0.000107261	8.86e-05	3.43e-05	4.96e-05	6.45e-05	6.58e-05	4.89e-05	5.88e-05	4.87e-05	5.81e-05	3.93e-05	0.539881
Metabolism	Lipid metabolism	ko00140	Steroid hormone biosynthesis	0.000946133	0.000821548	0.000869034	0.000868897	0.00103119	0.0010296	0.00068648	0.00088474	0.00102488	0.000988794	0.000870722	0.000926143	0.000877098	0.000870811	0.000749806	0.887146
Metabolism	Lipid metabolism	ko00072	Synthesis and degradation of ketone bodies	0.000671612	0.00092865	0.000692097	0.000592796	0.00078869	0.000892492	0.000694382	0.000790835	0.000812922	0.000696777	0.000599821	0.0006545	0.000602985	0.000825186	0.000746648	0.0981398
Environmental Information Processing	Membrane transport	ko02010	ABC transporters	0.0848433	0.0783669	0.0771809	0.0877496	0.0848998	0.0836673	0.094638	0.0969483	0.0732693	0.0893186	0.0868831	0.0869352	0.0870852	0.087469	0.0972448	0.367322
Environmental Information Processing	Membrane transport	ko03070	Bacterial secretion system	0.0234658	0.0187064	0.0249117	0.0238005	0.0174354	0.0187008	0.0171161	0.0167095	0.0235005	0.0234324	0.023941	0.0234087	0.0237944	0.0184943	0.0165996	0.00546099
Environmental Information Processing	Membrane transport	ko02060	Phosphotransferase system (PTS)	0.00852072	0.00498689	0.00823193	0.00935134	0.0104979	0.00778895	0.0149055	0.0133594	0.00701058	0.00800131	0.00921198	0.00897219	0.00924367	0.0129778	0.01433	0.099275
Metabolism	Metabolism of cofactors and vitamins	ko00780	Biotin metabolism	0.00468191	0.00565787	0.00520347	0.00439615	0.00525496	0.00543042	0.00484962	0.00466796	0.00573578	0.00479575	0.00445401	0.00448573	0.00444477	0.00487347	0.00464409	0.182291
Metabolism	Metabolism of cofactors and vitamins	ko00790	Folate biosynthesis	0.00499501	0.00683495	0.00543224	0.00479861	0.00595305	0.00599738	0.00560195	0.00560293	0.00577543	0.00504341	0.00483706	0.0049946	0.00482895	0.00596841	0.00575544	0.122188
Metabolism	Metabolism of cofactors and vitamins	ko00785	Lipoic acid metabolism	0.00129495	0.00177444	0.00136908	0.00128611	0.00156219	0.00148753	0.00141824	0.00136662	0.00128252	0.00127384	0.00129152	0.00131491	0.00128706	0.00144168	0.00141278	0.498303
Metabolism	Metabolism of cofactors and vitamins	ko00760	Nicotinate and nicotinamide metabolism	0.00761179	0.0116729	0.00820278	0.0074402	0.00822623	0.00807555	0.00849099	0.00813234	0.00853986	0.00749169	0.00749658	0.00770118	0.00746534	0.00883925	0.0081006	0.935366
Metabolism	Metabolism of cofactors and vitamins	ko00670	One carbon pool by folate	0.00392929	0.00483027	0.00421365	0.00383621	0.00457897	0.00451272	0.00486618	0.00473652	0.00460278	0.00396008	0.00385518	0.00392682	0.00384508	0.00488586	0.00476774	0.0106815
Metabolism	Metabolism of cofactors and vitamins	ko00770	Pantothenate and CoA biosynthesis	0.00603593	0.00676332	0.00617292	0.00598035	0.0068214	0.00674852	0.00654384	0.00654282	0.00653476	0.00608915	0.0059889	0.00605551	0.00598746	0.00660732	0.0065956	0.0039479
Metabolism	Metabolism of cofactors and vitamins	ko00860	Porphyrin and chlorophyll metabolism	0.0162433	0.016082	0.0148694	0.0159591	0.0160112	0.0167436	0.0121738	0.0137668	0.0156973	0.0164805	0.015918	0.0157977	0.0159647	0.0122846	0.0130957	0.26578
Metabolism	Metabolism of cofactors and vitamins	ko00830	Retinol metabolism	0.000506609	0.000542825	0.000479163	0.00049868	0.000471485	0.000497775	0.000436636	0.000472652	0.000483369	0.000508233	0.000497875	0.000504989	0.000500192	0.000462613	0.000456913	0.0193817
Metabolism	Metabolism of cofactors and vitamins	ko00740	Riboflavin metabolism	0.00340161	0.00425079	0.0037279	0.00330399	0.00350529	0.00352401	0.00344834	0.00335509	0.00396531	0.00347874	0.00333601	0.00339689	0.00331346	0.00362001	0.00331198	0.90312
Metabolism	Metabolism of cofactors and vitamins	ko00730	Thiamine metabolism	0.0050004	0.00564723	0.0051948	0.00493557	0.00577939	0.0057461	0.00578204	0.00565306	0.0053413	0.00502987	0.00494913	0.00503243	0.00494412	0.0058628	0.00579767	0.00548528
Metabolism	Metabolism of cofactors and vitamins	ko00130	Ubiquinone and other terpenoid-quinone biosynthesis	0.00831243	0.00877495	0.00807874	0.00838021	0.00744114	0.00743703	0.00596398	0.00611652	0.00754543	0.00805194	0.00838332	0.00832623	0.00838423	0.00646391	0.00588232	0.00287296
Metabolism	Metabolism of cofactors and vitamins	ko00750	Vitamin B6 metabolism	0.0037345	0.00420732	0.00373979	0.00379336	0.00326581	0.00347928	0.003095	0.00312359	0.00347359	0.00368694	0.00379512	0.00378095	0.00378822	0.00324216	0.00312719	0.00100493
Metabolism	Metabolism of other amino acids	ko00410	beta-Alanine metabolism	0.00211927	0.00225857	0.00200052	0.00205895	0.00187201	0.00207107	0.00137578	0.00162971	0.00195303	0.00212881	0.00206167	0.00211708	0.00206759	0.00167501	0.0015384	0.0131144
Metabolism	Metabolism of other amino acids	ko00460	Cyanoamino acid metabolism	0.00176741	0.00139794	0.00190572	0.00166327	0.00179993	0.00189543	0.00188546	0.00195979	0.00215804	0.00169011	0.00167815	0.00165489	0.00168405	0.00188405	0.00194929	0.0060734
Metabolism	Metabolism of other amino acids	ko00473	D-Alanine metabolism	0.00210492	0.00184125	0.00217327	0.00200403	0.00318631	0.00287024	0.00342028	0.00342852	0.00260446	0.00210242	0.00200326	0.00204247	0.00201573	0.00323829	0.00345926	0.000330215
Metabolism	Metabolism of other amino acids	ko00472	D-Arginine and D-ornithine metabolism	3.35e-05	2.31e-05	2.2e-05	2.43e-05	5.72e-05	7.77e-05	2.92e-05	4.77e-05	4.53e-05	3.42e-05	2.41e-05	2.48e-05	2.57e-05	2.91e-05	4.24e-05	0.00124681
Metabolism	Metabolism of other amino acids	ko00471	D-Glutamine and D-glutamate metabolism	0.00154251	0.00182376	0.00157492	0.00152782	0.00174725	0.00174455	0.00189607	0.00180864	0.00148408	0.00154952	0.00152819	0.00157838	0.00153008	0.00194214	0.00188954	0.104014
Metabolism	Metabolism of other amino acids	ko00480	Glutathione metabolism	0.00962357	0.0100728	0.00973456	0.00933269	0.00900251	0.00927155	0.00964002	0.00970055	0.0101522	0.00956602	0.00936348	0.00944519	0.00937539	0.00980835	0.00938138	0.693851
Metabolism	Metabolism of other amino acids	ko00440	Phosphonate and phosphinate metabolism	0.00189219	0.00215383	0.00173412	0.00182181	0.00169406	0.00189137	0.00151668	0.00173311	0.00180221	0.00210981	0.00181938	0.00187025	0.00182724	0.00166544	0.00165375	0.0594407
Metabolism	Metabolism of other amino acids	ko00450	Selenocompound metabolism	0.00660037	0.00539356	0.00611406	0.00692913	0.00550904	0.00531139	0.00544239	0.00538607	0.00512143	0.00636033	0.00687992	0.00671518	0.006892	0.00537169	0.00533229	0.00177167
Metabolism	Metabolism of other amino acids	ko00430	Taurine and hypotaurine metabolism	0.00211497	0.00215455	0.00202019	0.00205369	0.00189088	0.00199766	0.00172951	0.0019049	0.00206288	0.00211555	0.00205511	0.00207078	0.00205902	0.00180813	0.00179875	0.0197722
Metabolism	Metabolism of terpenoids and polyketides	ko00522	Biosynthesis of 12-, 14- and 16-membered macrolides	0.000416071	0.000247228	0.000350523	0.000446022	0.00048761	0.000448704	0.000240114	0.000257384	0.000285248	0.000467866	0.000440461	0.000437011	0.000441419	0.000234771	0.000284748	0.314601
Metabolism	Metabolism of terpenoids and polyketides	ko01051	Biosynthesis of ansamycins	0.00116263	0.000976514	0.00108404	0.00119917	0.00132664	0.00126297	0.0010618	0.0011213	0.00102224	0.00120288	0.00119063	0.00119867	0.00119334	0.0010658	0.00119855	0.645139
Metabolism	Metabolism of terpenoids and polyketides	ko01053	Biosynthesis of siderophore group nonribosomal peptides	0.00443534	0.00256011	0.00399331	0.00482709	0.00274601	0.00275174	0.00213445	0.00208048	0.00253506	0.00439249	0.00478807	0.00472854	0.00478191	0.00270279	0.00230266	0.000623781
Metabolism	Metabolism of terpenoids and polyketides	ko01056	Biosynthesis of type II polyketide backbone	5.06e-05	3.74e-05	4.45e-05	5.04e-05	4.85e-05	5.59e-05	3.4e-05	4.25e-05	4.48e-05	5.15e-05	5.02e-05	5.03e-05	5.03e-05	3.69e-05	3.86e-05	0.431462
Metabolism	Metabolism of terpenoids and polyketides	ko01057	Biosynthesis of type II polyketide products	0.000161155	0.000108511	0.000156022	0.000152848	0.000191104	0.000171634	0.000134261	0.000154303	0.000171097	0.000174454	0.00015347	0.00016341	0.000153096	0.000150988	0.000141925	0.44374
Metabolism	Metabolism of terpenoids and polyketides	ko01055	Biosynthesis of vancomycin group antibiotics	0.000371632	0.000374017	0.000368641	0.000367323	0.00037015	0.000389846	0.000360237	0.000374885	0.00039284	0.000376613	0.000367259	0.000356754	0.000369104	0.000336555	0.000369513	0.116767
Metabolism	Metabolism of terpenoids and polyketides	ko00906	Carotenoid biosynthesis	0.000555749	0.000316057	0.000374384	0.000386654	0.00130147	0.00126969	0.000631974	0.000935065	0.000884033	0.000559276	0.000384933	0.000440866	0.000401937	0.000654395	0.000716541	0.000265703
Metabolism	Metabolism of terpenoids and polyketides	ko00281	Geraniol degradation	0.00399294	0.00490861	0.00381112	0.00368257	0.00327722	0.00409315	0.00234916	0.00297052	0.00382745	0.00387654	0.00370629	0.00398692	0.00373387	0.00344911	0.00271295	0.0248431
Metabolism	Metabolism of terpenoids and polyketides	ko00903	Limonene and pinene degradation	0.00242892	0.00264065	0.00239114	0.00231542	0.0025638	0.00268913	0.00215631	0.00234625	0.00247091	0.00244787	0.00232335	0.00242808	0.00233162	0.00247001	0.00227061	0.964176
Metabolism	Metabolism of terpenoids and polyketides	ko00902	Monoterpenoid biosynthesis	4.66e-05	2.11e-05	1.99e-05	2.12e-05	7.99e-05	8.25e-05	1.85e-05	6.85e-05	9.36e-05	4.25e-05	2.11e-05	3.08e-05	2.47e-05	4.28e-05	3.89e-05	0.00702958
Metabolism	Metabolism of terpenoids and polyketides	ko01054	Nonribosomal peptide structures	0.00597305	0.0034892	0.0049217	0.00670388	0.0044997	0.00413868	0.00271201	0.00233382	0.00295992	0.00601161	0.0066013	0.00634658	0.00661795	0.00291056	0.00312802	0.00469214
Metabolism	Metabolism of terpenoids and polyketides	ko00523	Polyketide sugar unit biosynthesis	0.00114767	0.00110824	0.00112023	0.00114249	0.00106662	0.00113665	0.00114972	0.00118557	0.00119234	0.00111611	0.00113987	0.00110279	0.00114786	0.00108826	0.0012016	0.114779
Metabolism	Metabolism of terpenoids and polyketides	ko00909	Sesquiterpenoid and triterpenoid biosynthesis	6.31e-05	7.03e-05	5.71e-05	5.07e-05	0.000298972	0.00030224	7.66e-05	8.28e-05	6.66e-05	0.000163674	5.09e-05	4.93e-05	5.04e-05	8.47e-05	8.29e-05	0.0692531
Metabolism	Metabolism of terpenoids and polyketides	ko00900	Terpenoid backbone biosynthesis	0.00574094	0.00771075	0.00637336	0.00547054	0.00844791	0.00785611	0.00882094	0.00829519	0.00743583	0.00582679	0.00551313	0.00564855	0.00549327	0.00842737	0.00841795	0.00118392
Metabolism	Metabolism of terpenoids and polyketides	ko00253	Tetracycline biosynthesis	0.000459885	0.000644795	0.0005044	0.000447198	0.000494583	0.000496	0.000535524	0.000517479	0.000509035	0.000467574	0.000450823	0.000459093	0.000448682	0.000539627	0.000534459	0.416476
Metabolism	Metabolism of terpenoids and polyketides	ko00908	Zeatin biosynthesis	0.000459856	0.000710295	0.00052665	0.000437371	0.000657061	0.00064344	0.000795658	0.000730419	0.000623855	0.000469023	0.000441055	0.000458425	0.000439926	0.000756871	0.000755483	0.00691539
Organismal Systems	Nervous system	ko04725	Cholinergic synapse	3.42e-05	1.9e-05	2.67e-05	3.93e-05	2.35e-05	1.97e-05	1.29e-05	1.2e-05	1.29e-05	3.09e-05	3.85e-05	3.61e-05	3.87e-05	1.22e-05	1.58e-05	0.00455705
Organismal Systems	Nervous system	ko04728	Dopaminergic synapse	2.92e-05	9.66e-05	2.84e-05	2.59e-05	3.06e-05	4.34e-05	2.12e-05	2.76e-05	3.77e-05	2.6e-05	2.61e-05	2.79e-05	2.66e-05	2.65e-05	2.52e-05	0.705858
Organismal Systems	Nervous system	ko04727	GABAergic synapse	0.000409755	0.000349063	0.000388192	0.000414617	0.000388621	0.000405309	0.00037202	0.000378853	0.000390109	0.000408252	0.000413221	0.000410289	0.00041395	0.000362746	0.000377053	0.318229
Organismal Systems	Nervous system	ko04724	Glutamatergic synapse	0.000341997	0.000306113	0.000315159	0.000338029	0.000303925	0.000332902	0.000299176	0.00032239	0.000336767	0.000337268	0.000336835	0.000338389	0.00033848	0.000302937	0.000312976	0.227893
Organismal Systems	Nervous system	ko04723	Retrograde endocannabinoid signaling	0.000272366	0.000252341	0.000348609	0.000267512	0.000282227	0.000279213	0.000204131	0.000188387	0.000327716	0.000262044	0.000273894	0.000282806	0.000268866	0.000272034	0.000192214	0.172498
Organismal Systems	Nervous system	ko04726	Serotonergic synapse	4.71e-05	0.000106355	4.17e-05	4.64e-05	3.46e-05	4.63e-05	2.51e-05	3.16e-05	4.26e-05	4.2e-05	4.62e-05	4.66e-05	4.68e-05	3.03e-05	3.03e-05	0.124641
Organismal Systems	Nervous system	ko04721	Synaptic vesicle cycle	2.55e-05	1.93e-05	2.2e-05	2.63e-05	2.21e-05	1.63e-05	1.11e-05	1.39e-05	1.97e-05	2.42e-05	2.61e-05	2.57e-05	2.62e-05	1.29e-05	1.29e-05	0.00884626
Human Diseases	Neurodegenerative disease	ko05010	Alzheimer disease	0.000941057	0.0010638	0.00101361	0.000936746	0.00103023	0.000952095	0.00126147	0.00117067	0.00104903	0.000893772	0.000939947	0.000933052	0.000937494	0.00114204	0.00123955	0.0199091
Human Diseases	Neurodegenerative disease	ko05014	Amyotrophic lateral sclerosis (ALS)	0.00039836	0.00051139	0.00042291	0.000402155	0.000338722	0.000376277	0.000260315	0.000257936	0.00035557	0.000385578	0.000404762	0.0004018	0.000402282	0.000313747	0.000257148	0.00377551
Human Diseases	Neurodegenerative disease	ko05016	Huntington disease	0.000546249	0.000625915	0.000609073	0.000528221	0.000565387	0.000577177	0.000462153	0.000484181	0.00064008	0.000552253	0.000534395	0.000529113	0.000530601	0.000472146	0.000475772	0.66119
Human Diseases	Neurodegenerative disease	ko05012	Parkinson disease	0.000212433	0.000254906	0.000211613	0.000211239	0.000187653	0.000175808	0.000177273	0.00018282	0.00022706	0.000214051	0.000211396	0.000208105	0.000211675	0.000174803	0.000182738	0.0431376
Human Diseases	Neurodegenerative disease	ko05020	Prion diseases	0.00012969	0.000112551	0.000125162	0.000136679	6.9e-05	8.03e-05	5.43e-05	5.74e-05	9.22e-05	0.000124062	0.000136376	0.000132041	0.000136214	6.85e-05	5.2e-05	0.000149057
Metabolism	Nucleotide metabolism	ko00230	Purine metabolism	0.0307722	0.0353449	0.0321372	0.0305043	0.0341281	0.033348	0.038412	0.0366916	0.0336122	0.0308664	0.0305667	0.0308216	0.0305143	0.0372276	0.0372541	0.0147247
Metabolism	Nucleotide metabolism	ko00240	Pyrimidine metabolism	0.0178982	0.0215169	0.0190639	0.0175483	0.022399	0.0211894	0.0263691	0.0246609	0.0210012	0.0179465	0.017593	0.0179205	0.0175755	0.0251594	0.025207	0.0053551
Genetic Information Processing	Replication and repair	ko03410	Base excision repair	0.00552326	0.00581671	0.00610164	0.00535104	0.00650047	0.00645212	0.00718434	0.00685465	0.00673924	0.00558942	0.00539161	0.00539885	0.00537429	0.00686169	0.0069029	0.000393344
Genetic Information Processing	Replication and repair	ko03030	DNA replication	0.00422944	0.00535973	0.00479255	0.00405881	0.00593254	0.00557574	0.0069867	0.00644886	0.0055553	0.00432085	0.00408927	0.0041893	0.00407475	0.00657016	0.00660618	0.00183043
Genetic Information Processing	Replication and repair	ko03460	Fanconi anemia pathway	7.4e-06	2.97e-05	8.18e-06	8.18e-06	2.86e-05	6.98e-06	1.93e-05	1.38e-05	8.3e-06	6.63e-06	8.02e-06	8.23e-06	8.08e-06	1.62e-05	1.4e-05	0.34307
Genetic Information Processing	Replication and repair	ko03440	Homologous recombination	0.0114644	0.016063	0.0131929	0.0114218	0.0132813	0.0123618	0.0155901	0.013926	0.0134353	0.0114926	0.01152	0.011651	0.0114242	0.0151014	0.0144144	0.156937
Genetic Information Processing	Replication and repair	ko03430	Mismatch repair	0.00788252	0.00965878	0.00895	0.00772687	0.0105133	0.00974843	0.0127052	0.0114568	0.00987265	0.00796321	0.00777662	0.00788513	0.00773943	0.0118159	0.0117842	0.00376612
Genetic Information Processing	Replication and repair	ko03450	Non-homologous end-joining	0.000338973	0.00020701	0.000334608	0.00028545	0.000441124	0.000589329	0.000237443	0.000337301	0.000533862	0.000370484	0.000289358	0.000298177	0.000293444	0.000266671	0.000274637	0.0599154
Genetic Information Processing	Replication and repair	ko03420	Nucleotide excision repair	0.00729352	0.0095151	0.00828307	0.007042	0.0103543	0.00954616	0.0121418	0.0110016	0.0097088	0.00752902	0.00709555	0.00725765	0.00706434	0.0113703	0.0111851	0.00235804
Environmental Information Processing	Signal transduction	ko04020	Calcium signaling pathway	3.84e-05	2.1e-05	3.28e-05	4.37e-05	2.77e-05	2.13e-05	1.58e-05	1.34e-05	1.81e-05	3.46e-05	4.31e-05	4.01e-05	4.31e-05	1.55e-05	1.68e-05	0.00381572
Environmental Information Processing	Signal transduction	ko04011	MAPK signaling pathway - yeast	0.000317288	0.000363137	0.000340935	0.000250495	0.000604372	0.000588564	0.000469983	0.000553797	0.000520019	0.000357043	0.000255203	0.000277502	0.000258689	0.000470049	0.000534953	1.51e-05
Environmental Information Processing	Signal transduction	ko04064	NF-kappa B signaling pathway	1.51e-07	5.97e-08	4.09e-09	0	5.25e-07	3.97e-07	2.03e-07	1.25e-06	2.38e-07	0	0	0	0	1.06e-07	5.07e-07	0.00218679
Environmental Information Processing	Signal transduction	ko04330	Notch signaling pathway	2.73e-06	1.52e-06	1.82e-06	2.28e-06	2.53e-06	3.95e-06	1.76e-06	2.71e-06	2.97e-06	2.68e-06	2.25e-06	2.38e-06	2.36e-06	2.2e-06	2.51e-06	0.105638
Environmental Information Processing	Signal transduction	ko04070	Phosphatidylinositol signaling system	0.000587911	0.000702037	0.000622571	0.000560523	0.000714749	0.00069952	0.000728566	0.000731823	0.00070077	0.000612932	0.000563788	0.000575	0.000563147	0.000709864	0.00073565	0.000753926
Environmental Information Processing	Signal transduction	ko02020	Two-component system	0.0958261	0.0780355	0.0904294	0.0990822	0.0716698	0.0760248	0.0644194	0.0664499	0.0820286	0.0916005	0.0987082	0.095976	0.0988417	0.0662401	0.0666522	0.0024411
Environmental Information Processing	Signal transduction	ko04370	VEGF signaling pathway	1.95e-07	1.18e-07	1.76e-07	5.34e-09	3.11e-06	2.02e-06	2.81e-06	3.51e-06	9.04e-07	3.22e-08	0	4.79e-09	0	1.98e-06	2.85e-06	9.16e-05
Environmental Information Processing	Signal transduction	ko04310	Wnt signaling pathway	2.73e-06	1.52e-06	1.82e-06	2.28e-06	2.53e-06	3.95e-06	1.76e-06	2.71e-06	2.97e-06	2.68e-06	2.25e-06	2.38e-06	2.36e-06	2.2e-06	2.51e-06	0.105638
Environmental Information Processing	Signaling molecules and interaction	ko04514	Cell adhesion molecules (CAMs)	1.35e-06	7.46e-07	1.04e-06	1.56e-06	2.19e-07	2.36e-07	3.54e-07	2.92e-07	4.13e-07	1.2e-06	1.53e-06	1.43e-06	1.54e-06	3.43e-07	4.38e-07	0.000264318
Environmental Information Processing	Signaling molecules and interaction	ko04512	ECM-receptor interaction	2.6e-05	2.02e-05	2.1e-05	2.95e-05	7.88e-06	8.08e-06	1.05e-05	1.13e-05	9.9e-06	2.34e-05	2.9e-05	2.76e-05	2.92e-05	1.08e-05	1.23e-05	0.000109625
Environmental Information Processing	Signaling molecules and interaction	ko04080	Neuroactive ligand-receptor interaction	5.6e-06	3.04e-06	4.89e-06	5.86e-06	5.36e-06	3.13e-06	1.91e-06	3.01e-06	5.44e-06	6.05e-06	5.82e-06	6.37e-06	5.81e-06	3.41e-06	2.03e-06	0.0308522
Human Diseases	Substance dependence	ko05034	Alcoholism	7.37e-05	0.000221525	6.76e-05	6.85e-05	6.05e-05	7.68e-05	4.85e-05	5.41e-05	8.21e-05	6.76e-05	6.86e-05	7.32e-05	6.98e-05	5.83e-05	5.35e-05	0.310181
Human Diseases	Substance dependence	ko05031	Amphetamine addiction	2.87e-05	9.62e-05	2.76e-05	2.53e-05	2.92e-05	4.27e-05	2.01e-05	2.63e-05	3.68e-05	2.53e-05	2.55e-05	2.72e-05	2.6e-05	2.53e-05	2.38e-05	0.675653
Human Diseases	Substance dependence	ko05030	Cocaine addiction	2.87e-05	9.62e-05	2.76e-05	2.53e-05	2.92e-05	4.27e-05	2.01e-05	2.63e-05	3.68e-05	2.53e-05	2.55e-05	2.72e-05	2.6e-05	2.53e-05	2.38e-05	0.675653
Human Diseases	Substance dependence	ko05032	Morphine addiction	8.6e-05	5.88e-05	7.22e-05	7.77e-05	0.000108896	0.000129051	6.32e-05	7.97e-05	0.000102657	7.95e-05	7.77e-05	8.48e-05	7.91e-05	8.02e-05	6.91e-05	0.124584
Genetic Information Processing	Transcription	ko03022	Basal transcription factors	0.000171471	9.54e-05	0.000138716	0.000194801	0.000150994	0.000111617	0.000211252	0.000191663	0.000105618	0.000169128	0.000190741	0.000179767	0.000191594	0.000165465	0.000215343	0.926914
Genetic Information Processing	Transcription	ko03020	RNA polymerase	0.00146539	0.00200371	0.00168661	0.0013897	0.0020479	0.00193499	0.00236071	0.00219609	0.00197829	0.00150068	0.00140382	0.00145158	0.00139737	0.00226844	0.00224625	0.00313788
Genetic Information Processing	Transcription	ko03040	Spliceosome	2.01e-08	3.01e-08	6.91e-08	0	4.43e-07	4.76e-06	1.24e-07	9.45e-08	2.36e-05	1.34e-07	0	0	0	5.39e-08	1.75e-07	0.138288
Genetic Information Processing	Translation	ko00970	Aminoacyl-tRNA biosynthesis	0.0208312	0.0280333	0.0240014	0.0198013	0.0288962	0.0278284	0.0337314	0.0315094	0.0282033	0.0213603	0.0199973	0.0206575	0.0199084	0.0324042	0.0321796	0.00261312
Genetic Information Processing	Translation	ko03015	mRNA surveillance pathway	4.5e-06	2.66e-06	3.4e-06	4.81e-06	2.49e-05	2.51e-05	3.75e-06	6.29e-06	2.69e-06	4e-06	4.72e-06	4.51e-06	4.79e-06	3.3e-06	4.79e-06	0.0621452
Genetic Information Processing	Translation	ko03010	Ribosome	0.0121611	0.0166233	0.0139683	0.011526	0.0174202	0.0165529	0.020105	0.0187629	0.0164821	0.0125155	0.0116356	0.0120445	0.0115907	0.0192206	0.0192651	0.00228294
Genetic Information Processing	Translation	ko03008	Ribosome biogenesis in eukaryotes	0.000861149	0.00106404	0.0010034	0.000881998	0.000827006	0.000766943	0.00092946	0.000805781	0.000963067	0.000854886	0.000890745	0.000877824	0.000879685	0.000924215	0.000845038	0.148228
Genetic Information Processing	Translation	ko03013	RNA transport	0.00162456	0.00163279	0.00270438	0.00154792	0.00273759	0.00241605	0.00325653	0.00269938	0.00319503	0.00168508	0.0016182	0.00154319	0.00155206	0.00293775	0.00274256	0.00180158
Cellular Processes	Transport and catabolism	ko04144	Endocytosis	2.73e-05	1.51e-05	1.31e-05	1.94e-05	2.33e-05	2.71e-05	9.33e-06	2.9e-05	3.15e-05	2.38e-05	1.91e-05	2.01e-05	2.07e-05	1.39e-05	2.08e-05	0.200686
Cellular Processes	Transport and catabolism	ko04142	Lysosome	0.000542957	0.000283978	0.000747166	0.00047445	0.000582094	0.000694747	0.00072255	0.000788071	0.000906403	0.000566273	0.000490418	0.000495422	0.000486208	0.000781435	0.000788383	0.0127008
Cellular Processes	Transport and catabolism	ko04146	Peroxisome	0.00216253	0.00308171	0.00220751	0.00208912	0.00216545	0.00227751	0.00178157	0.00193735	0.00226046	0.00213449	0.00210036	0.00214771	0.00209739	0.00199935	0.00186934	0.267923
Metabolism	Xenobiotics biodegradation and metabolism	ko00627	Aminobenzoate degradation	0.00423052	0.00367128	0.00436757	0.00382693	0.00519898	0.0053425	0.00432625	0.0048916	0.00515986	0.00437278	0.00386396	0.00406567	0.00387364	0.00482835	0.00454648	0.001649
Metabolism	Xenobiotics biodegradation and metabolism	ko00791	Atrazine degradation	0.0012219	0.00122584	0.00118913	0.00125774	0.00105591	0.00103409	0.000897669	0.000966087	0.00102327	0.00121997	0.00125545	0.00125352	0.00125051	0.000933496	0.000963891	0.000575778
Metabolism	Xenobiotics biodegradation and metabolism	ko00362	Benzoate degradation	0.00542451	0.00514705	0.00539363	0.00507563	0.00550379	0.00592355	0.00474015	0.00533084	0.00574528	0.00559713	0.00510676	0.00537088	0.00511254	0.00556742	0.00492437	0.773657
Metabolism	Xenobiotics biodegradation and metabolism	ko00363	Bisphenol degradation	0.00263829	0.00246538	0.00250028	0.0024778	0.00278365	0.00295924	0.00237555	0.0026542	0.00280022	0.00266617	0.00248208	0.00256396	0.00250162	0.00262479	0.00247525	0.126215
Metabolism	Xenobiotics biodegradation and metabolism	ko00930	Caprolactam degradation	0.00141968	0.00134239	0.00152382	0.00124778	0.00134574	0.00160458	0.00107307	0.00128419	0.00163377	0.00133354	0.00127152	0.00137947	0.00127613	0.00153885	0.00117394	0.839547
Metabolism	Xenobiotics biodegradation and metabolism	ko00625	Chloroalkane and chloroalkene degradation	0.0029458	0.00267818	0.00278227	0.00285836	0.00302621	0.00314936	0.00289565	0.00306805	0.003044	0.0030762	0.00285453	0.00289241	0.00286387	0.002913	0.00289559	0.026766
Metabolism	Xenobiotics biodegradation and metabolism	ko00361	Chlorocyclohexane and chlorobenzene degradation	0.00131598	0.00117493	0.00130197	0.00121026	0.0013567	0.00145447	0.00101816	0.00122755	0.00150604	0.00142926	0.00121964	0.00129106	0.00122146	0.0012737	0.00106057	0.996418
Metabolism	Xenobiotics biodegradation and metabolism	ko00621	Dioxin degradation	0.000661161	0.000413117	0.000654261	0.000662837	0.000606604	0.000566235	0.000554204	0.000582204	0.000637741	0.000697104	0.000662839	0.000662335	0.000660699	0.000581817	0.000535422	0.224406
Metabolism	Xenobiotics biodegradation and metabolism	ko00982	Drug metabolism - cytochrome P450	0.00121758	0.00131424	0.00115884	0.00112086	0.00107399	0.00131231	0.000888534	0.00110465	0.0013287	0.0012103	0.00112614	0.00116486	0.00113672	0.00105343	0.00099071	0.450103
Metabolism	Xenobiotics biodegradation and metabolism	ko00983	Drug metabolism - other enzymes	0.00232958	0.00261385	0.00242588	0.0023071	0.00295933	0.00283266	0.00330318	0.00316622	0.00265638	0.00234324	0.00230718	0.00233557	0.00230615	0.00311357	0.00323263	0.00113242
Metabolism	Xenobiotics biodegradation and metabolism	ko00642	Ethylbenzene degradation	0.00117475	0.00135126	0.0011948	0.00115429	0.00135135	0.00127654	0.00124994	0.00126017	0.001203	0.00119205	0.00115768	0.00120241	0.00115512	0.00132753	0.00123191	0.176564
Metabolism	Xenobiotics biodegradation and metabolism	ko00364	Fluorobenzoate degradation	0.000539863	0.000502458	0.000520058	0.000510429	0.000450412	0.000547435	0.000289108	0.000382695	0.000527972	0.000552724	0.000513307	0.000540828	0.000514319	0.000445883	0.000323359	0.0232225
Metabolism	Xenobiotics biodegradation and metabolism	ko00980	Metabolism of xenobiotics by cytochrome P450	0.00118936	0.00120815	0.00112472	0.00109103	0.00104563	0.00126279	0.000854881	0.00106465	0.00129839	0.00118402	0.00109599	0.00113489	0.00110791	0.00103041	0.000955951	0.434381
Metabolism	Xenobiotics biodegradation and metabolism	ko00626	Naphthalene degradation	0.00202193	0.00217613	0.00185946	0.0019616	0.00171545	0.00189804	0.00150088	0.00170654	0.00184041	0.00208542	0.00195882	0.00201834	0.00196953	0.00171891	0.00158899	0.00286363
Metabolism	Xenobiotics biodegradation and metabolism	ko00633	Nitrotoluene degradation	0.00263508	0.00251737	0.00224186	0.00282807	0.00161369	0.00159981	0.00135982	0.00148443	0.00180194	0.00246508	0.00279701	0.00273527	0.0028027	0.00146636	0.00138857	0.000195325
Metabolism	Xenobiotics biodegradation and metabolism	ko00624	Polycyclic aromatic hydrocarbon degradation	0.0018794	0.00137409	0.00200421	0.00176536	0.00236577	0.00243517	0.00239628	0.00249124	0.00219983	0.0019572	0.00177691	0.00186655	0.00177842	0.00258447	0.00250751	0.00240468
Metabolism	Xenobiotics biodegradation and metabolism	ko00984	Steroid degradation	0.000728772	0.000571532	0.000668945	0.000647715	0.000805328	0.000708615	0.000491565	0.000650445	0.000843575	0.000775352	0.000650442	0.000719741	0.000652411	0.000714724	0.000519575	0.836924
Metabolism	Xenobiotics biodegradation and metabolism	ko00643	Styrene degradation	0.000897603	0.000875295	0.000843721	0.000814356	0.000878417	0.00099948	0.00063356	0.000831364	0.0010022	0.000947551	0.000817969	0.000853114	0.000823793	0.000748758	0.00073605	0.999095
Metabolism	Xenobiotics biodegradation and metabolism	ko00623	Toluene degradation	0.00141656	0.00133768	0.0013908	0.00135106	0.00132005	0.00140206	0.0010382	0.00116485	0.00143694	0.00142065	0.0013576	0.00140843	0.00135973	0.00125843	0.00102904	0.050042
Metabolism	Xenobiotics biodegradation and metabolism	ko00622	Xylene degradation	0.000790744	0.000599869	0.000781854	0.000782407	0.000734006	0.00069332	0.00063639	0.00068328	0.000740165	0.000835265	0.000783525	0.000807613	0.00078095	0.000754485	0.00063904	0.0227199
